# Supplementary material for: Rescue of Escherichia coli auxotrophy by de novo small proteins
Source: eLife journal article supplement (doi:10.7554/elife.78299), 2023-03-15
Supplement: fig3-figsupp2-data4 [file Figure 3-figure supplement 2 - labeled source data 4.pdf › Figure 3-figure supplement 2 - labeled source data 4.pdf]

Lysate/input

Unbound

Wash

Eluate/output

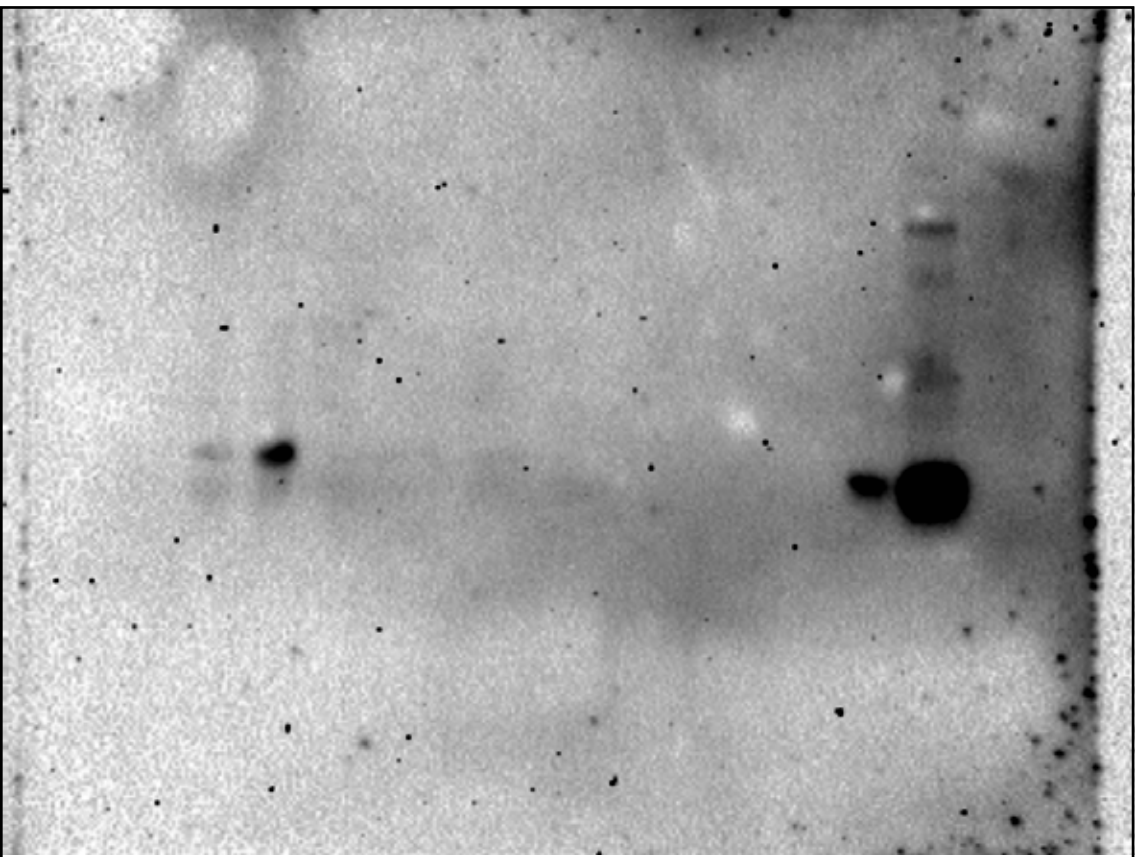

Hdp1<sup>opt</sup>-HA  
Hdp1<sup>opt</sup> L27Q-HA  
Hdp1<sup>opt</sup> untagged  
Hdp1<sup>opt</sup>-HA  
Hdp1<sup>opt</sup> L27Q-HA  
Hdp1<sup>opt</sup> untagged  
Hdp1<sup>opt</sup>-HA  
Hdp1<sup>opt</sup> L27Q-HA  
Hdp1<sup>opt</sup> untagged
