# Supplementary material for: Rescue of Escherichia coli auxotrophy by de novo small proteins
Source: eLife journal article supplement (doi:10.7554/elife.78299), 2023-03-15

[Hdp1<sub>opt</sub>] (μM)

Hdp1<sub>opt</sub> Replicate 4

Hdp1<sub>opt</sub> L27Q Replicate 1

0 0.35 0.69 1.39 2.77 5.54 0 0.35 0.69 1.39 2.77 5.54

*his* RNA + Hdp1<sub>opt</sub>

unbound *his* RNA

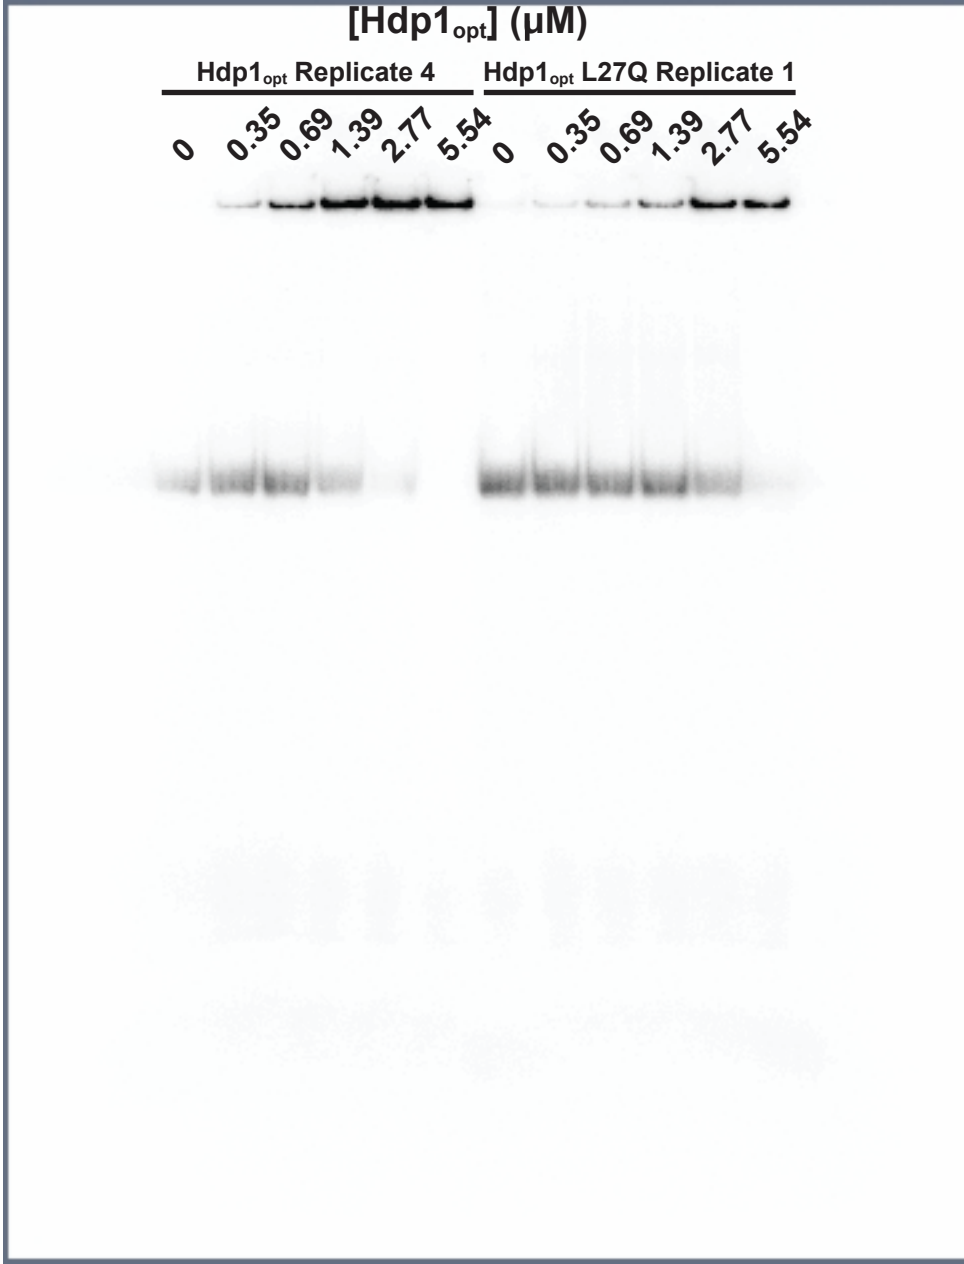

Supplement: fig3-figsupp3-data3 [file elife-78299-fig3-figsupp3-data3-v2.zip]
