# Supplementary material for: Rescue of Escherichia coli auxotrophy by de novo small proteins
Source: eLife. 2023 Mar 15;12:e78299. doi: 10.7554/eLife.78299 (PMC10065794; doi:10.7554/eLife.78299)
Supplement: Figure 1—source data 1. [file elife-78299-fig1-data1.xlsx]

## Sheet: Figure 1-source data1
	size (aa)	diversity (x10^8)	sequence	# Stop	bias
rnd 10	10	1.34	(NNB)	1	none
rnd 20	20	1.42	(NNB)	1	none
rnd 50a	50	1.71	(NNB)	1	none
rnd 50b	50	1.04	(VNC)	0	primordial
rnd 50c	50	0.31	(XYZ)	<1	hydrophilic
rnd 100	100	10.5	(NNB)	1	none
N: A 25%, G 25%, C 25%, T 25%		V: A 33%, G 33%, C 33%		X: A 30%, G 31%, C 25%, T 14%
B: G 50%, C 25%, T 25%		C: C 50%, T 50%		Y: A 41%, G 23%, C 25%, T 11%
				Z: G 56%, C 22%, T 22%
