# Supplementary material for: Rescue of Escherichia coli auxotrophy by de novo small proteins
Source: eLife. 2023 Mar 15;12:e78299. doi: 10.7554/eLife.78299 (PMC10065794; doi:10.7554/eLife.78299)
Supplement: Figure 3—source data 1. [file elife-78299-fig3-data1.zip]

Archive with 28 entries (28 files):
- Figure 3B-source data 1.jpeg
- __MACOSX/._Figure 3B-source data 1.jpeg
- Figure 3B-source data 2.jpeg
- __MACOSX/._Figure 3B-source data 2.jpeg
- Figure 3B-source data 3.jpeg
- __MACOSX/._Figure 3B-source data 3.jpeg
- Figure 3B-source data 4.jpeg
- __MACOSX/._Figure 3B-source data 4.jpeg
- Figure 3B-source data 5.jpeg
- __MACOSX/._Figure 3B-source data 5.jpeg
- Figure 3B-source data 6.jpeg
- __MACOSX/._Figure 3B-source data 6.jpeg
- Figure 3D-source data 1.jpeg
- __MACOSX/._Figure 3D-source data 1.jpeg
- Figure 3B - labeled source data 1.pdf
- __MACOSX/._Figure 3B - labeled source data 1.pdf
- Figure 3B - labeled source data 2.pdf
- __MACOSX/._Figure 3B - labeled source data 2.pdf
- Figure 3B - labeled source data 3.pdf
- __MACOSX/._Figure 3B - labeled source data 3.pdf
- Figure 3B - labeled source data 4.pdf
- __MACOSX/._Figure 3B - labeled source data 4.pdf
- Figure 3B - labeled source data 5.pdf
- __MACOSX/._Figure 3B - labeled source data 5.pdf
- Figure 3B - labeled source data 6.pdf
- __MACOSX/._Figure 3B - labeled source data 6.pdf
- Figure 3D - labeled source data 1.pdf
- __MACOSX/._Figure 3D - labeled source data 1.pdf
