# Supplementary material for: Rescue of Escherichia coli auxotrophy by de novo small proteins
Source: eLife. 2023 Mar 15;12:e78299. doi: 10.7554/eLife.78299 (PMC10065794; doi:10.7554/eLife.78299)
Supplement: Figure 3—source data 1. [file elife-78299-fig3-data1.zip › Figure 3D - labeled source data 1.pdf]

(i)

[Hdp1<sub>opt</sub>] (μM)  
NR OH T1 0 0.69 5.54

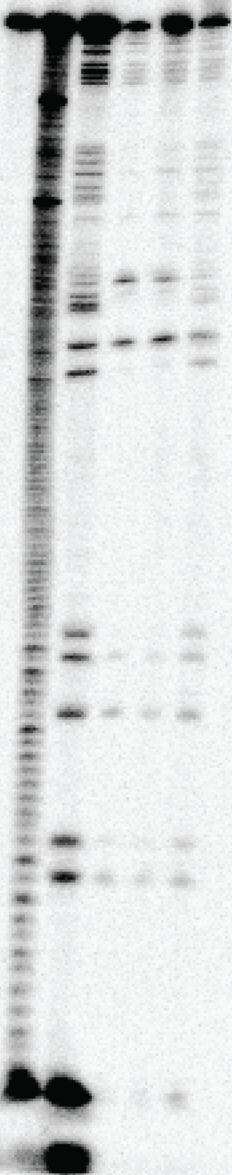

(ii)

[Hdp1<sub>opt</sub>] (μM)  
NR OH T1 0 0.69 5.54

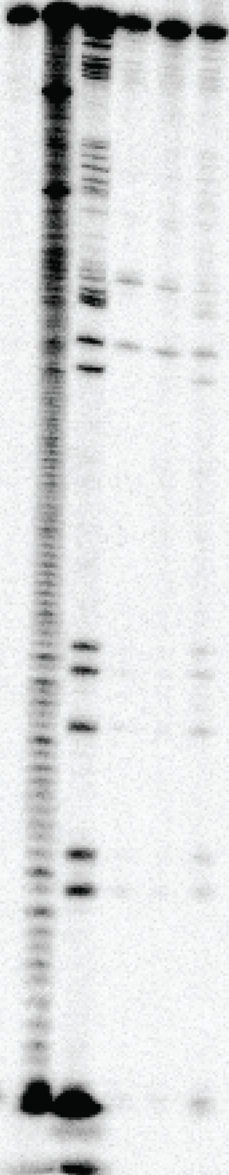

(iii)

[Hdp1<sub>opt</sub>] (μM)  
NR OH T1 0 5.54

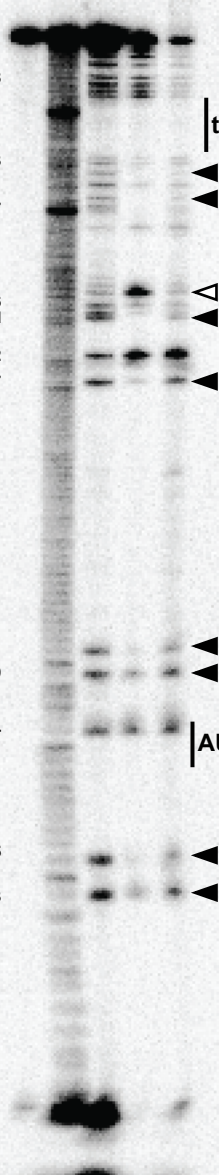

G187/188

G141/143

G126/127

G96  
G90/91

G82

G77

G41

G39

G34

G25

G23

terminator

UAG

AUG

SD
