# Supplementary material for: Rescue of Escherichia coli auxotrophy by de novo small proteins
Source: eLife. 2023 Mar 15;12:e78299. doi: 10.7554/eLife.78299 (PMC10065794; doi:10.7554/eLife.78299)
Supplement: Supplementary file 1. — (a) KEIO deletion strains screened with the random sequence libraries. (b) Summary of Hdp1-2 single mutants obtained via random mutagenesis. (c) Escherichia coli K-12 strains used in this study. (d) Fraction bound data as quantified and calculated from the electrophoretic mobility shift assay (EMSA) gels. (e) Parameters from fitting of different binding models to the EMSA data. (f) Plasmids used in this study. (g) Oligonucleotides used in this study. [file elife-78299-supp1.xlsx]

## Sheet: supplementary file 1a
Supplementary Table S1. KEIO deletion strains screened with the random sequence libraries.
	Deletion	KEIO Number
1	argA	K1678
2	argB	K2968
3	argC	K349
4	argE	K1697
5	argF	K1628
6	argH	K1698
7	aroB	K2158
8	aroC	K1668
9	aroD	K1652
10	aroE	K1684
11	bioB	K1720
12	bioC	K1722
13	bioH	K3816
14	carA	K3625
15	carB	K2015
16	cysC	K1943
17	cysD	K1945
18	cysH	K1946
19	cysI	K1947
20	cysJ	K1948
21	fes	K1615
22	glnA	K1695
23	guaB	K2917
24	glyA	K1673
25	hisA	K2539
26	hisB	K2538
27	hisC	K1661
28	hisD	K1660
29	hisF	K1662
30	hisG	K1659
31	hisH	K327
32	hisI	K1663
33	ilvA	K1693
34	ilvC	K2809
35	ilvE	K1692
36	iscS	K2780
37	leuA	K1622
38	leuB	K3737
39	leuC	K1621
40	leuD	K1620
41	lipA	K1716
42	lysA	K1679
43	metA	K1699
44	metB	K1696
45	metC	K1682
46	metE	K1694
47	metH	K1700
48	nadB	K1750
49	pabA	K1759
50	pabB	K1736
51	panB	K1709
52	panC	K1708
53	pdxB	K1747
54	pdxJ	K1749
55	pheA	K1675
56	proA	K1626
57	proB	K1625
58	proC	K1629
59	purA	K2217
60	purC	K3628
61	purD	K2216
62	purE	K2031
63	pyrB	K2222
64	pyrC	K2040
65	pyrE	K2214
66	serB	K1704
67	serC	K1634
68	thrB	K1640
69	thrC	K2753
70	trpA	K1639
71	trpB	K1640
72	trpD	K1641
73	trpE	K1642
74	tyrA	K1676

## Sheet: supplementary file 1b
Supplementary Table 2. Summary of Hdp1-2 single mutants obtained via random mutagenesis.
Strain Name	Mutation	Phenotype	Notes
DA59150	Hdp1 L7Q	Functional	Mutation used to generate Hdp1opt variant with improved solubility
DA59225	Hdp1 F8Y	Functional	Mutation used to generate Hdp1opt variant with improved solubility
DA59534	Hdp1 L10Q	Functional	Mutation used to generate Hdp1opt variant with improved solubility
DA59905	Hdp1 L18Q	Nonfunctional
DA59226	Hdp1 L18H	Nonfunctional
DA59536	Hdp1 A19S	Functional	Mutation used to generate Hdp1opt variant with improved solubility
DA58844	Hdp1 L20P	Reduced function
DA58843	Hdp1 G21A	Nonfunctional
DA58846	Hdp1 G21S	Nonfunctional
DA58845	Hdp1 Y22N	Nonfunctional
DA59228	Hdp1 F23Y	Functional	Mutation used to generate Hdp1opt variant with improved solubility
DA58974	Hdp1 F26Y	Functional	Mutation used to generate Hdp1opt variant with improved solubility
DA60252	Hdp1 L27Q	Nonfunctional
DA59537	Hdp1 V28N	Nonfunctional
DA59906	Hdp1 V32N	Functional	Mutation used to generate Hdp1opt variant with improved solubility
DA58715	Hdp2 H3L	Nonfunctional
DA58716	Hdp2 I12T	Nonfunctional
DA58712	Hdp2 Y34N	Reduced function
DA58711	Hdp2 P36L	Nonfunctional
DA58713	Hdp2 P36S	Nonfunctional

## Sheet: supplementary file 1c
Supplementary Table S3. Escherichia coli K-12 strains used in this study. All strains are derivatives of DA28696 (BW25113) or DA5438 (MG1655), as noted.
Strain Name	Genotype	Description	Reporter Construct Sequence
DA28696	BW25113 (DEL(araD-araB)567, DEL(rhaD-rhaB)568, DELlacZ4787, rrnB-3, hsdR514, rph-1)	KEIO collection WT background strain	N/A
DA5438	MG1655 (fadK::IS1, yohK[L34S])	MG1655 laboratory reference strain	N/A
DA46988	MG1655, DELserB::FRT-scar, DELgph::FRT-scar	MG1655 DELserB, DELgph double knockout strain	N/A
DA47137	MG1655, DELserB::FRT-scar, DELgph::FRT-scar, DELytjC::kanR	MG1655 DELserB, DELgph, DELytjC triple knockout strain	N/A
DA47568	MG1655, DELserB::FRT-scar, DELgph::FRT-scar, DELytjC::FRT-scar, DELhisB::FRT-scar	MG1655 DELserB, DELgph, DELytjC, DELhisB quadruple knockout strain	N/A
DA49247	BW25113, DELserB::FRT-scar, DELhisB::FRT-scar	MG1655 DELserB, DELhisB double knockout strain	N/A
DA57390	BW25113, DELserB::kanR, PlacZ::zeoR-PhisL-hisL-his attenuator-lacZ	Full-length his operator (hisL promoter + hisL leader peptide + attenuator region)-lacZ transcriptional fusion	CATTGCCATAAAATATATAAAAAAGCCCTTGCTTTCTAACGTGAAAGTGGTTTAGGTTAAAAGACGTCAGTTGAATAAACATTCACAGAGACTTTTATGACACGCGTTCAATTTAAACACCACCATCATCACCATCATCCTGACTAGTCTTTCAGGCGATGTGTGCTGGAAGACATTCAGATCTTCCAGTGGTGCATGAACGCATGAGAAAGCCCCCGGAAGATCACCTTCCGGGGGCTTTTTTATTGCGCGGTTGATAACGGTTCAGACAGGTTTAAAATTAGGAAATTTTATGACCATGATTACGGATTCACTGGCCGTCGTTTTACAACGT
DA57393	BW25113, DELserB::kanR, PlacZ::zeoR-PhisL-lacZ	hisL promoter-lacZ transcriptional fusion	CATTGCCATAAAATATATAAAAAAGCCCTTGCTTTCTAACGTGAAAGTGGTTTAGGTTAAAAGACATCAGTTGAATAAACATTCACATTAGGAAATTTTATGACCATGATTACGGATTCACTGGCCGTCGTTTTACAACGT
DA57395	BW25113, DELserB::kanR, PlacZ::zeoR-PhisL-hisL-lacZ	hisL promoter + hisL leader peptide-lacZ transcriptional fusion	CATTGCCATAAAATATATAAAAAAGCCCTTGCTTTCTAACGTGAAAGTGGTTTAGGTTAAAAGACATCAGTTGAATAAACATTCACAGAGACTTTTATGACACGCGTTCAATTTAAACACCACCATCATCACCATCATCCTGACTAGTCTTTCAGGCGATGATTAGGAAATTTTATGACCATGATTACGGATTCACTGGCCGTCGTTTTACAACGT
DA57397	BW25113, DELserB::kanR, PlacZ::zeoR-PhisL-hisL-truncated his attenuator-lacZ	hisL promoter + hisL leader peptide + truncated attenuator region (without the terminator stem)-lacZ transcriptional fusion; truncated after G170, relative to TSS +1	CATTGCCATAAAATATATAAAAAAGCCCTTGCTTTCTAACGTGAAAGTGGTTTAGGTTAAAAGACATCAGTTGAATAAACATTCACAGAGACTTTTATGACACGCGTTCAATTTAAACACCACCATCATCACCATCATCCTGACTAGTCTTTCAGGCGATGTGTGCTGGAAGACATTCAGATCTTCCAGTGGTGCATGAACGCATGAGAAAGCCCCCGGAAGATCACCTTCCGGGATTAGGAAATTTTATGACCATGATTACGGATT
DA75886	BW25113, DELserB::kanR, PlacZ::zeoR-PhisL-hisL(Q5Stop)-his attenuator-lacZ	Full-length his operator (hisL promoter + hisL leader peptide + attenuator region)-lacZ transcriptional fusion, with Q5Stop nonsense mutation in hisL CDS	CATTGCCATAAAATATATAAAAAAGCCCTTGCTTTCTAACGTGAAAGTGGTTTAGGTTAAAAGACGTCAGTTGAATAAACATTCACAGAGACTTTTATGACACGCGTTTAATTTAAACACCACCATCATCACCATCATCCTGACTAGTCTTTCAGGCGATGATTAGGAAATTTTATGACCATGATTACGGATTCACTGGCCGTCGTTTTACAACGT
DA57399	BW25113, DELserB::kanR, PlacZ::zeoR-PhisB-lacZ	hisB promoter-lacZ transcriptional fusion	GGCGCGCTTTAAAGCCTCCAGTGCGGTGTTTAAATCTTTGTGGGATCAGGGCATTATCTTACGTGATCAGAATAAACAACCATTAGGAAATTTTATGACCATGATTACGGATTCACTGGCCGTCGTTTTACAACGT
DA58212	BW25113, DELserB::kanR, PlacZ::zeoR-ParaBAD-hisL-his attenuator-lacZ	araBAD promoter + his operator-lacZ transcriptional fusion	AGAGAAGAAACCAATTGTCCATATTGCATCAGACATTGCCGTCACTGCGTCTTTTACTGGCTCTTCTCGCTAACCAAACCGGTAACCCCGCTTATTAAAAGCATTCTGTAACAAAGCGGGACCAAAGCCATGACAAAAACGCGTAACAAAAGTGTCTATAATCACGGCAGAAAAGTCCACATTGATTATTTGCACGGCGTCACACTTTGCTATGCCATAGCATTTTTATCCATAAGATTAGCGGATCCTACCTGACGCTTTTTTATTGCAACTCTCTACTGTTTCTCCATACCCGTTTTTTTGGATCACAGAGACTTTTATGACACGCGTTCAATTTAAACACCACCATCATCACCATCATCCTGACTAGTCTTTCAGGCGATGTGTGCTGGAAGACAT…
DA58210	BW25113, DELserB::kanR, PlacZ::zeoR-Plac-PhisL-his attenuator-lacZ	lac promoter + his operator-lacZ transcriptional fusion	ATGTGAGCGGATAACATTGACATTGTGAGCGGATAACAAGATACTGACGTCATAGGAACTTCAAGATCCCCTTATTAGAAGAACTCGTCAAGAAGGCGATAGAATCACAGAGACTTTTATGACACGCGTTCAATTTAAACACCACCATCATCACCATCATCCTGACTAGTCTTTCAGGCGATGTGTGCTGGAAGACATTCAGATCTTCCAGTGGTGCATGAACGCATGAGAAAGCCCCCGGAAGATCACCTTCCGGGGGCTTTTTTATTGCGCGGTTGATAACGGTTCAGACAGGTTTAAAATTAGGAAATTTTATGACCATGATTACGGATTCACTGGCCGTCGTTTTACAACGT
DA60213	BW25113, DELserB::kanR, PlacZ::zeoR-PrrnB1-lacZ	rrnB P1 promoter-lacZ transcriptional fusion (reporter for stringent response)	CAGAAAATTATTTTAAATTTCCTCTTGTCAGGCCGGAATAACTCCCTATAATGCGCCACCACTGACACGGAACAACGGCAAACACATTTGGAAAAAAATTTTATGACCATGATTACGGATTCACTGGCCGTCGTTTTACAACGT
DA60214	BW25113, DELserB::kanR, PlacZ::zeoR-PthrL-thrL-thr attenuator-lacZ	Full-length thr operator (thrL promoter + thrL leader peptide + attenuator region)-lacZ transcriptional fusion), reporter for specificity and stringent response	GCCGTGAGTAAATTAAAATTTTATTGACTTAGGTCACTAAATACTTTAACCAATATAGGCATAGCGCACAGACAGATAAAAATTACAGAGTACACAACATCCATGAAACGCATTAGCACCACCATTACCACCACCATCACCATTACCACAGGTAACGGTGCGGGCTGACGCGTACAGGAAACACAGAAAAAAGCCCGCACCTGACAGTGCGGGCTTTTTTTTTCGACCAAAGGTAACATTTAGGAAAAAAAATGACCATGATTACGGATTCACTGGCCGTCGTTTTACAACGT
DA62881	BW25113, DELserB::FRT scar, DELrelA::kanR, PlacZ::zeoR-PhisL-hisL-his attenuator-lacZ, /pRD2-Empty	Full-length his operator (hisL promoter + hisL leader peptide + attenuator region)-lacZ transcriptional fusion in DELrelA background (reporter for stringent response)	CATTGCCATAAAATATATAAAAAAGCCCTTGCTTTCTAACGTGAAAGTGGTTTAGGTTAAAAGACGTCAGTTGAATAAACATTCACAGAGACTTTTATGACACGCGTTCAATTTAAACACCACCATCATCACCATCATCCTGACTAGTCTTTCAGGCGATGTGTGCTGGAAGACATTCAGATCTTCCAGTGGTGCATGAACGCATGAGAAAGCCCCCGGAAGATCACCTTCCGGGGGCTTTTTTATTGCGCGGTTGATAACGGTTCAGACAGGTTTAAAATTAGGAAATTTTATGACCATGATTACGGATTCACTGGCCGTCGTTTTACAACGT
DA62882	BW25113, DELserB::FRT scar, DELrelA::kanR, PlacZ::zeoR-PhisL-hisL-his attenuator-lacZ, /pRD2-Hdp1	Full-length his operator (hisL promoter + hisL leader peptide + attenuator region)-lacZ transcriptional fusion in DELrelA background (reporter for stringent response)	CATTGCCATAAAATATATAAAAAAGCCCTTGCTTTCTAACGTGAAAGTGGTTTAGGTTAAAAGACGTCAGTTGAATAAACATTCACAGAGACTTTTATGACACGCGTTCAATTTAAACACCACCATCATCACCATCATCCTGACTAGTCTTTCAGGCGATGTGTGCTGGAAGACATTCAGATCTTCCAGTGGTGCATGAACGCATGAGAAAGCCCCCGGAAGATCACCTTCCGGGGGCTTTTTTATTGCGCGGTTGATAACGGTTCAGACAGGTTTAAAATTAGGAAATTTTATGACCATGATTACGGATTCACTGGCCGTCGTTTTACAACGT
DA62883	BW25113, DELserB::FRT scar, DELdksA::kanR, PlacZ::zeoR-PhisL-hisL-his attenuator-lacZ, /pRD2-Empty	Full-length his operator (hisL promoter + hisL leader peptide + attenuator region)-lacZ transcriptional fusion in DELdksA background (reporter for stringent response)	CATTGCCATAAAATATATAAAAAAGCCCTTGCTTTCTAACGTGAAAGTGGTTTAGGTTAAAAGACGTCAGTTGAATAAACATTCACAGAGACTTTTATGACACGCGTTCAATTTAAACACCACCATCATCACCATCATCCTGACTAGTCTTTCAGGCGATGTGTGCTGGAAGACATTCAGATCTTCCAGTGGTGCATGAACGCATGAGAAAGCCCCCGGAAGATCACCTTCCGGGGGCTTTTTTATTGCGCGGTTGATAACGGTTCAGACAGGTTTAAAATTAGGAAATTTTATGACCATGATTACGGATTCACTGGCCGTCGTTTTACAACGT
DA62884	BW25113, DELserB::FRT scar, DELdksA::kanR, PlacZ::zeoR-PhisL-hisL-his attenuator-lacZ, /pRD2-Hdp1	Full-length his operator (hisL promoter + hisL leader peptide + attenuator region)-lacZ transcriptional fusion in DELdksA background (reporter for stringent response)	CATTGCCATAAAATATATAAAAAAGCCCTTGCTTTCTAACGTGAAAGTGGTTTAGGTTAAAAGACGTCAGTTGAATAAACATTCACAGAGACTTTTATGACACGCGTTCAATTTAAACACCACCATCATCACCATCATCCTGACTAGTCTTTCAGGCGATGTGTGCTGGAAGACATTCAGATCTTCCAGTGGTGCATGAACGCATGAGAAAGCCCCCGGAAGATCACCTTCCGGGGGCTTTTTTATTGCGCGGTTGATAACGGTTCAGACAGGTTTAAAATTAGGAAATTTTATGACCATGATTACGGATTCACTGGCCGTCGTTTTACAACGT
DA76634	MG1655, PlacZ::zeoR-PhisL-hisL-his attenuator-lacZ	Full-length his operator (hisL promoter + hisL leader peptide + attenuator region)-lacZ transcriptional fusion in MG1655 WT background	CATTGCCATAAAATATATAAAAAAGCCCTTGCTTTCTAACGTGAAAGTGGTTTAGGTTAAAAGACGTCAGTTGAATAAACATTCACAGAGACTTTTATGACACGCGTTCAATTTAAACACCACCATCATCACCATCATCCTGACTAGTCTTTCAGGCGATGTGTGCTGGAAGACATTCAGATCTTCCAGTGGTGCATGAACGCATGAGAAAGCCCCCGGAAGATCACCTTCCGGGGGCTTTTTTATTGCGCGGTTGATAACGGTTCAGACAGGTTTAAAATTAGGAAATTTTATGACCATGATTACGGATTCACTGGCCGTCGTTTTACAACGT
K146	BW25113, DELserB::kanR	KEIO collection DELserB knockout strain	N/A
K1634	BW25113, DELserC::kanR	KEIO collection DELserC knockout strain	N/A
K1681	BW25113, DELserA::kanR	KEIO collection DELserA knockout strain	N/A

## Sheet: supplementary file 1d
Supplementary Table S4. Fraction bound data as quantified and calculated from the EMSA gels.
(i) Hdp1opt + his RNA fraction bound
Conc. [uM]	Replicate 1	Replicate 2	Replicate 3	Replicate 4	MEAN	STD DEV	STD ERROR
0	0.316711	0.124017	0.16973	0.0126958	0.155788	0.12593	0.0629651
0.346289	0.553714	0.527244	0.479331	0.252826	0.453279	0.137135	0.0685675
0.692578	0.726766	0.695831	0.674018	0.563891	0.665126	0.0708754	0.0354377
1.38516	0.878679	0.856831	0.768426	0.861615	0.841388	0.0495369	0.0247685
2.77031	0.969023	0.944988	0.916083	0.966362	0.949114	0.0245082	0.0122541
5.54063	0.998444	0.990396	0.983945	0.993635	0.991605	0.0060835	0.00304175
(ii) Hdp1opt L27Q + his RNA fraction bound
Conc. [uM]	Replicate 1	Replicate 2	Replicate 3	MEAN	STD DEV	STD ERROR
0	0.0676748	0.0154727	0.104208	0.0624517	0.0445974	0.0257483
0.346289	0.107939	0.133025	0.154082	0.131682	0.0231009	0.0133373
0.692578	0.240654	0.259688	0.25881	0.253051	0.0107448	0.00620354
1.38516	0.377495	0.500743	0.533694	0.470644	0.0823346	0.0475359
2.77031	0.736548	0.691226	0.727703	0.718493	0.0240239	0.0138702
5.54063	0.912389	0.967783	0.877399	0.91919	0.0455745	0.0263125
(iii) Hdp1opt + thr RNA fraction bound
Conc. [uM]	Replicate 1	Replicate 2	Replicate 3	MEAN	STD DEV	STD ERROR
0	0.0411489	0.0443101	0.0175832	0.0343474	0.0146041	0.00843165
0.346289	0.221613	0.197739	0.132004	0.183785	0.0464057	0.0267924
0.692578	0.430296	0.408236	0.277809	0.372114	0.0824119	0.0475806
1.38516	0.647313	0.559637	0.458281	0.555077	0.0945985	0.0546164
2.77031	0.887904	0.754606	0.750515	0.797675	0.0781674	0.0451299
5.54063	0.972425	0.896194	0.903936	0.924185	0.0419562	0.0242234

## Sheet: supplementary file 1e
Supplementary Table S5. Parameters from fitting of different binding models to the EMSA data.
(i) Fitted parameters for hyperbolic binding with constant
	Hdp1opt + his RNA	Hdp1opt L27Q + his RNA	Hdp1opt + thr RNA
Best-fit values
Bmax	0.9698	1.451	1.216
Kd	0.6287	3.335	1.726
C	0.1458	0.02997	0.01626
Std. Error
Bmax	0.05859	0.1273	0.08314
Kd	0.1315	0.7077	0.3686
C	0.04033	0.02472	0.03394
95% CI (asymptotic)
Bmax	0.85 to 1.09	1.18 to 1.72	1.04 to 1.39
Kd	0.36 to 0.90	1.83 to 4.84	0.94 to 2.51
C	0.06 to 0.23	-0.02 to 0.08	-0.06 to 0.09
Goodness of Fit
Degrees of Freedom	21	15	15
R squared	0.9363	0.9789	0.9671
Sum of Squares	0.1411	0.03724	0.06117
Sy.x	0.08198	0.04983	0.06386
Number of points
# of X values	24	24	30
# Y values analyzed	24	18	18
(ii) Fitted parameters for one site binding positive cooperativity
	Hdp1opt + his RNA	Hdp1opt L27Q + his RNA	Hdp1opt + thr RNA
Best-fit values
Bmax	0.8666	1.019	1.029
h	1.438	1.502	1.295
Kd	0.5431	1.823	1.279
C	0.1558	0.05946	0.03307
Std. Error
Bmax	0.07124	0.09685	0.1217
h	0.3366	0.2141	0.2537
Kd	0.08184	0.2615	0.2749
C	0.03998	0.02283	0.03561
95% CI (asymptotic)
Bmax	0.72 to 1.02	0.81 to 1.23	0.77 to 1.29
h	0.74 to 2.14	1.04 to 1.96	0.75 to 1.84
Kd	0.37 to 0.71	1.26 to 2.38	0.69 to 1.87
C	0.07 to 0.24	0.01 to 0.11	-0.04 to 0.11
Goodness of Fit
Degrees of Freedom	20	14	14
R squared	0.9421	0.9861	0.9705
Sum of Squares	0.1284	0.02445	0.05485
Sy.x	0.08012	0.04179	0.0626
Number of points
# of X values	24	24	30
# Y values analyzed	24	18	18

## Sheet: supplementary file 1f
Supplementary Table S6. Plasmids used in this study.
Strain Name	Plasmid	Description	Cloned Insert Nucleotide Sequence (5'-3')
DA57496	pRD2 (Empty)	Empty plasmid backbone used for constructing the random plasmid libraries.	N/A
DA57497	pRD2-Hdp1		ATGTACAGTAGGTCTTCGCTGTTTTCTCTGTTCTTTTCGTGCACCAGTAATCTTGCGCTCGGCTACTTTCGCCCCTTCTTGGTTTATCATTGGGTGGGTCACAGGTGTAAGTGTGAGGGTATCGAGCGTCGGGTGACTAGGTGGTGGTAG
DA57498	pRD2-Hdp2		ATGTTCCACTTATCTATTTTAACTATGTCTATGATTATTTGTCGTCGTTTCTTATTATTATTATCTGTTGGTCGTATTTTCATTTTCTTAACTGTTATTTATTGTCCAATGTTATTATTCCACACTATTTTCTATTTATTAGATTCTTAA
DA58280	pRD2-Hdp3		ATGTGGAAGACGGGGAGCATCACTGTTTTGAGTACTTTCGTTAACATTTCTAGTCGGCTGCTGCTTACTAGTAGGATGATCAACCCCCTTGATTACTGGGCCGTTGTGAGTACCTACAAGCATGTCTTGATGTATCATATCGTGAACGTTTAACTAAGTAA
DA44605	pRD3 (Empty)	Early prototype of pRD2 plasmid backbone for random plasmid libraries, lacking the sacB counterelectable marker.	N/A
DA44587	pRD3-Hdp1		ATGTACAGTAGGTCTTCGCTGTTTTCTCTGTTCTTTTCGTGCACCAGTAATCTTGCGCTCGGCTACTTTCGCCCCTTCTTGGTTTATCATTGGGTGGGTCACAGGTGTAAGTGTGAGGGTATCGAGCGTCGGGTGACTAGGTGGTGGTAG
DA45393	pRD3-Hdp1_fs	Hdp1 with frame 1 +1 frameshift mutation.	ATGTACAGTAGGTCTTCAGCTGTTTTCTCTGTTCTTTTCGTGCACCAGTAATCTTGCGCTCGGCTACTTTCGCCCCTTCTTGGTTTATCATTGGGTGGGTCACAGGTGTAAGTGTGAGGGTATCGAGCGTCGGGTGACTAGGTGGTGGTAG
DA44593	pRD3-Hdp1_nonsense	Hdp1 with frame 1 nonsense/premature stop codon, inserted at codon 4.	ATGTACAGTTAAAGGTCTTCGCTGTTTTCTCTGTTCTTTTCGTGCACCAGTAATCTTGCGCTCGGCTACTTTCGCCCCTTCTTGGTTTATCATTGGGTGGGTCACAGGTGTAAGTGTGAGGGTATCGAGCGTCGGGTGACTAGGTGGTGGTAG
DA44590	pRD3-Hdp1_recoded		ATGTACTCTCGTTCTTCTCTGTTCTCTCTGTTCTTCTCTTGCACCTCTAACCTGGCGCTGGGTTACTTCCGTCCGTTCCTGGTTTACCACTGGGTTGGTCACCGTTGCAAATGCGAAGGTATCGAACGTCGTGTTACCCGTTGGTGGTAA
DA45391	pRD3-Hdp1_DEL(start)	Hdp1 with frame 1 ATG start codon deleted (M1DEL).	TACAGTAGGTCTTCGCTGTTTTCTCTGTTCTTTTCGTGCACCAGTAATCTTGCGCTCGGCTACTTTCGCCCCTTCTTGGTTTATCATTGGGTGGGTCACAGGTGTAAGTGTGAGGGTATCGAGCGTCGGGTGACTAGGTGGTGGTAG
DA76655	pRD2-Hdp1 DEL(10aa N-terminus)	Truncated Hdp1 with first 10 aa deleted from N-terminus (excluding ATG start codon).	ATGTTTTCGTGCACCAGTAATCTTGCGCTCGGCTACTTTCGCCCCTTCTTGGTTTATCATTGGGTGGGTCACAGGTGTAAGTGTGAGGGTATCGAGCGTCGGGTGACTAGGTGGTGGTAG
DA76656	pRD2-Hdp1 DEL(10aa C-terminus)	Truncated Hdp1 with last 10 aa deleted from C-terminus (excluding TAG stop codon).	ATGTACAGTAGGTCTTCGCTGTTTTCTCTGTTCTTTTCGTGCACCAGTAATCTTGCGCTCGGCTACTTTCGCCCCTTCTTGGTTTATCATTGGGTGGGTCACAGGTGTAAGTGTGAGTAG
DA76657	pRD2-Hdp1 DEL(20aa C-terminus)	Truncated Hdp1 with last 20 aa deleted from C-terminus (excluding TAG stop codon).	ATGTACAGTAGGTCTTCGCTGTTTTCTCTGTTCTTTTCGTGCACCAGTAATCTTGCGCTCGGCTACTTTCGCCCCTTCTTGGTTTATTAG
DA59150	pRD2-Hdp1 L7Q		ATGTACAGTAGGTCTTCGCAGTTTTCTCTGTTCTTTTCGTGCACCAGTAATCTTGCGCTCGGCTACTTTCGCCCCTTCTTGGTTTATCATTGGGTGGGTCACAGGTGTAAGTGTGAGGGTATCGAGCGTCGGGTGACTAGGTGGTGGTAG
DA59225	pRD2-Hdp1 F8Y		ATGTACAGTAGGTCTTCGCTGTATTCTCTGTTCTTTTCGTGCACCAGTAATCTTGCGCTCGGCTACTTTCGCCCCTTCTTGGTTTATCATTGGGTGGGTCACAGGTGTAAGTGTGAGGGTATCGAGCGTCGGGTGACTAGGTGGTGGTAG
DA59534	pRD2-Hdp1 L10Q		ATGTACAGTAGGTCTTCGCTGTTTTCTCAGTTCTTTTCGTGCACCAGTAATCTTGCGCTCGGCTACTTTCGCCCCTTCTTGGTTTATCATTGGGTGGGTCACAGGTGTAAGTGTGAGGGTATCGAGCGTCGGGTGACTAGGTGGTGGTAG
DA59905	pRD2-Hdp1 L18Q		ATGTACAGTAGGTCTTCGCTGTTTTCTCTGTTCTTTTCGTGCACCAGTAATCAAGCGCTCGGCTACTTTCGCCCCTTCTTGGTTTATCATTGGGTGGGTCACAGGTGTAAGTGTGAGGGTATCGAGCGTCGGGTGACTAGGTGGTGGTAG
DA59226	pRD2-Hdp1 L18H		ATGTACAGTAGGTCTTCGCTGTTTTCTCTGTTCTTTTCGTGCACCAGTAATCATGCGCTCGGCTACTTTCGCCCCTTCTTGGTTTATCATTGGGTGGGTCACAGGTGTAAGTGTGAGGGTATCGAGCGTCGGGTGACTAGGTGGTGGTAG
DA59536	pRD2-Hdp1 A19S		ATGTACAGTAGGTCTTCGCTGTTTTCTCTGTTCTTTTCGTGCACCAGTAATCTTTCGCTCGGCTACTTTCGCCCCTTCTTGGTTTATCATTGGGTGGGTCACAGGTGTAAGTGTGAGGGTATCGAGCGTCGGGTGACTAGGTGGTGGTAG
DA58844	pRD2-Hdp1 L20P		ATGTACAGTAGGTCTTCGCTGTTTTCTCTGTTCTTTTCGTGCACCAGTAATCTTGCGCCCGGCTACTTTCGCCCCTTCTTGGTTTATCATTGGGTGGGTCACAGGTGTAAGTGTGAGGGTATCGAGCGTCGGGTGACTAGGTGGTGGTAG
DA58843	pRD2-Hdp1 G21A		ATGTACAGTAGGTCTTCGCTGTTTTCTCTGTTCTTTTCGTGCACCAGTAATCTTGCGCTCGCCTACTTTCGCCCCTTCTTGGTTTATCATTGGGTGGGTCACAGGTGTAAGTGTGAGGGTATCGAGCGTCGGGTGACTAGGTGGTGGTAG
DA58846	pRD2-Hdp1 G21S		ATGTACAGTAGGTCTTCGCTGTTTTCTCTGTTCTTTTCGTGCACCAGTAATCTTGCGCTCAGCTACTTTCGCCCCTTCTTGGTTTATCATTGGGTGGGTCACAGGTGTAAGTGTGAGGGTATCGAGCGTCGGGTGACTAGGTGGTGGTAG
DA58845	pRD2-Hdp1 Y22N		ATGTACAGTAGGTCTTCGCTGTTTTCTCTGTTCTTTTCGTGCACCAGTAATCTTGCGCTCGGCAACTTTCGCCCCTTCTTGGTTTATCATTGGGTGGGTCACAGGTGTAAGTGTGAGGGTATCGAGCGTCGGGTGACTAGGTGGTGGTAG
DA59228	pRD2-Hdp1 F23Y		ATGTACAGTAGGTCTTCGCTGTTTTCTCTGTTCTTTTCGTGCACCAGTAATCTTGCGCTCGGCTACTATCGCCCCTTCTTGGTTTATCATTGGGTGGGTCACAGGTGTAAGTGTGAGGGTATCGAGCGTCGGGTGACTAGGTGGTGGTAG
DA58974	pRD2-Hdp1 F26Y		ATGTACAGTAGGTCTTCGCTGTTTTCTCTGTTCTTTTCGTGCACCAGTAATCTTGCGCTCGGCTACTTTCGCCCCTACTTGGTTTATCATTGGGTGGGTCACAGGTGTAAGTGTGAGGGTATCGAGCGTCGGGTGACTAGGTGGTGGTAG
DA60252	pRD2-Hdp1 L27Q		ATGTACAGTAGGTCTTCGCTGTTTTCTCTGTTCTTTTCGTGCACCAGTAATCTTGCGCTCGGCTACTTTCGCCCCTTCCAGGTTTATCATTGGGTGGGTCAAAGGTGTAAGTGTGAGGGTATCGAGCGTCGGGTGACTAGGTGGTGGTAG
DA59537	pRD2-Hdp1 V28N		ATGTACAGTAGGTCTTCGCTGTTTTCTCTGTTCTTTTCGTGCACCAGTAATCTTGCGCTCGGCTACTTTCGCCCCTTCTTGAATTATCATTGGGTGGGTCACAGGTGTAAGTGTGAGGGTATCGAGCGTCGGGTGACTAGGTGGTGGTAG
DA59906	pRD2-Hdp1 V32N		ATGTACAGTAGGTCTTCGCTGTTTTCTCTGTTCTTTTCGTGCACCAGTAATCTTGCGCTCGGCTACTTTCGCCCCTTCTTGGTTTATCATTGGAATGGTCACAGGTGTAAGTGTGAGGGTATCGAGCGTCGGGTGACTAGGTGGTGGTAG
DA44956	pRD3-Hdp2		ATGTTCCACTTATCTATTTTAACTATGTCTATGATTATTTGTCGTCGTTTCTTATTATTATTATCTGTTGGTCGTATTTTCATTTTCTTAACTGTTATTTATTGTCCAATGTTATTATTCCACACTATTTTCTATTTATTAGATTCTTAA
DA76658	pRD2-Hdp2_fs	Hdp2 with frame 1 +1 frameshift mutation.	ATGTTCCACTTAGTCTATTTTAACTATGTCTATGATTATTTGTCGTCGTTTCTTATTATTATTATCTGTTGGTCGTATTTTCATTTTCTTAACTGTTATTTATTGTCCAATGTTATTATTCCACACTATTTTCTATTTATTAGATTCTTAA
DA44602	pRD3-Hdp2_nonsense	Hdp2 with frame 1 nonsense/premature stop codon, inserted at codon 4. (with silent mutation in codon 3, CAC to CAT).	ATGTTCCATTAATTAAGTATACTTACAATGTCCATGATTATTTGTCGACGATTTTTGTTGTTATTGTCAGTGGGCCGTATCTTTATTTTTTTGACCGTTATTTATTGCCCGATGCTTCTTTTTCATACTATCTTCTATTTGTTGGATTCCTAA
DA44599	pRD3-Hdp2_recoded		ATGTTCCATTTAAGTATACTTACAATGTCCATGATTATTTGTCGACGATTTTTGTTGTTATTGTCAGTGGGCCGTATCTTTATTTTTTTGACCGTTATTTATTGCCCGATGCTTCTTTTTCATACTATCTTCTATTTGTTGGATTCCTAA
DA76660	pRD2-Hdp2 DEL(10aa N-terminus)	Truncated Hdp2 with first 10 aa deleted from N-terminus (excluding ATG start codon).	ATGATTATTTGTCGTCGTTTCTTATTATTATTATCTGTTGGTCGTATTTTCATTTTCTTAACTGTTATTTATTGTCCAATGTTATTATTCCACACTATTTTCTATTTATTAGATTCTTAA
DA76661	pRD2-Hdp2 DEL(20aa N-terminus)	Truncated Hdp2 with first 20 aa deleted from N-terminus (excluding ATG start codon).	ATGTCTGTTGGTCGTATTTTCATTTTCTTAACTGTTATTTATTGTCCAATGTTATTATTCCACACTATTTTCTATTTATTAGATTCTTAA
DA76662	pRD2-Hdp2 DEL(10aa C-terminus)	Truncated Hdp2 with first 10 aa deleted from C-terminus (excluding TAA stop codon).	ATGTTCCACTTATCTATTTTAACTATGTCTATGATTATTTGTCGTCGTTTCTTATTATTATTATCTGTTGGTCGTATTTTCATTTTCTTAACTGTTATTTATTGTCCAATGTTATTATAA
DA58715	pRD2-Hdp2 H3L		ATGTTCCTCTTATCTATTTTAACTATGTCTATGATTATTTGTCGTCGTTTCTTATTATTATTATCTGTTGGTCGTATTTTCATTTTCTTAACTGTTATTTATTGTCCAATGTTATTATTCCACACTATTTTCTATTTATTAGATTCTTAA
DA58716	pRD2-Hdp2 I12T		ATGTTCCACTTATCTATTTTAACTATGTCTATGACTATTTGTCGTCGTTTCTTATTATTATTATCTGTTGGTCGTATTTTCATTTTCTTAACTGTTATTTATTGTCCAATGTTATTATTCCACACTATTTTCTATTTATTAGATTCTTAA
DA58712	pRD2-Hdp2 Y34N		ATGTTCCACTTATCTATTTTAACTATGTCTATGATTATTTGTCGTCGTTTCTTATTATTATTATCTGTTGGTCGTATTTTCATTTTCTTAACTGTTATTAATTGTCCAATGTTATTATTCCACACTATTTTCTATTTATTAGATTCTTAA
DA58711	pRD2-Hdp2 P36L		ATGTTCCACTTATCTATTTTAACTATGTCTATGATTATTTGTCGTCGTTTCTTATTATTATTATCTGTTGGTCGTATTTTCATTTTCTTAACTGTTATTTATTGTCTAATGTTATTATTCCACACTATTTTCTATTTATTAGATTCTTAA
DA58713	pRD2-Hdp2 P36S		ATGTTCCACTTATCTATTTTAACTATGTCTATGATTATTTGTCGTCGTTTCTTATTATTATTATCTGTTGGTCGTATTTTCATTTTCTTAACTGTTATTTATTGTTCAATGTTATTATTCCACACTATTTTCTATTTATTAGATTCTTAA
DA59951	pRD2-Hdp1opt(+cys)	Early Hdp1opt prototype with cys residues still present; still functional.	ATGTACAGTAGGTCTTCGCAGTATTCTCAGTACTATTCGTGCACCAGTAATCTTTCGCTCGGCTACTATCGCCCCTACTTGGTTTATCATTGGGTGGGTCACAGGTGTAAGTGTGAGGGTACCGAGCGTCGGCAGACTAGGTAGTAG
DA60179	pRD2-Hdp1opt(+cys)-FLAG tag	Early Hdp1opt prototype (with cys residues still present) with FLAG tag (+ KRRGPGNST linker) added to the C-terminus; not functional.	ATGTACAGTAGGTCTTCGCAGTATTCTCAGTACTATTCGTGCACCAGTAATCTTTCGCTCGGCTACTATCGCCCCTACTTGGTTTATCATTGGGTGGGTCACAGGTGTAAGTGTGAGGGTACCGAGCGTCGGCAGACTAGGAAACGTCGCGGTCCTGGTAATTCTACTGACTACAAAGACGATGACGACAAGTAGTAG
DA60253	pRD2-Hdp1opt(+cys)-MYC tag	Early Hdp1opt prototype (with cys residues still present) with MYC tag (+ KRRGPGNST linker) added to the C-terminus; not functional.	ATGTACAGTAGGTCTTCGCAGTATTCTCAGTACTATTCGTGCACCAGTAATCTTTCGCTCGGCTACTATCGCCCCTACTTGGTTTATCATTGGGTGGGTCACAGGTGTAAGTGTGAGGGTACCGAGCGTCGGCAGACTAGGAAACGTCGCGGTCCTGGTAATTCTACTGAACAAAAGCTCATCTCCGAAGAGGATCTCTAGTAG
DA60374	pRD2-Hdp1opt(+cys)-HA tag	Early Hdp1opt prototype (with cys residues still present) with HA tag (+ RRGPGNST linker) added to the C-terminus; still functional.	ATGTACAGTAGGTCTTCGCAGTATTCTCAGTACTATTCGTGCACCAGTAATCTTTCGCTCGGCTACTATCGCCCCTACTTGGTTTATCATTGGGTGGGTCACAGGTGTAAGTGTGAGGGTACCGAGCGTCGGCAGACTAGGCGTCGCGGTCCTGGTAATTCTACTTACCCATACGATGTTCCAGATTACGCTTAGTAG
DA76758	pRD2-Hdp1opt(+cys) L27Q-HA tag	Early Hdp1opt prototype (with cys residues still present) with L27Q mutation and HA tag (+ RRGPGNST linker) added to the C-terminus; not functional.	ATGTACAGTAGGTCTTCGCAGTATTCTCAGTACTATTCGTGCACCAGTAATCTTTCGCTCGGCTACTATCGCCCCTACCAGGTTTATCATTGGGTGGGTCACAGGTGTAAGTGTGAGGGTACCGAGCGTCGGCAGACTAGGCGTCGCGGTCCTGGTAATTCTACTTACCCATACGATGTTCCAGATTACGCTTAGTAG
DA76700	pRD2-Hdp1opt	Hdp1opt used for in vitro studies; functional.	ATGTACAGTAGGTCTTCGCAGTATTCTCAGTACTATTCGTCCACCAGTAATCTTTCGCTCGGCTACTATCGCCCCTACTTGGTTTATCATTGGAATGGTCACAGGTCTAAGTCTGAGGGTACCGAGCGTCGGCAGACTAGGTAGTAG
DA76701	pRD2-Hdp1opt L27Q	Hdp1opt L27Q mutant variant used for in vitro studies; not functional.	ATGTACAGTAGGTCTTCGCAGTATTCTCAGTACTATTCGTCCACCAGTAATCTTTCGCTCGGCTACTATCGCCCCTACCAGGTTTATCATTGGAATGGTCACAGGTCTAAGTCTGAGGGTACCGAGCGTCGGCAGACTAGGTAGTAG
DA76663	pRD2-serB		ATGCCTAACATTACCTGGTGCGACCTGCCTGAAGATGTCTCTTTATGGCCGGGTCTGCCTCTTTCATTAAGTGGTGATGAAGTGATGCCACTGGATTACCACGCAGGTCGTAGCGGCTGGCTGCTGTATGGTCGTGGGCTGGATAAACAACGTCTGACCCAATACCAGAGCAAACTGGGTGCGGCGATGGTGATTGTTGCCGCCTGGTGCGTGGAAGATTATCAGGTGATTCGTCTGGCAGGTTCACTCACCGCACGGGCTACACGCCTGGCCCACGAAGCGCAGCTGGATGTCGCCCCGCTGGGGAAAATCCCGCACCTGCGCACGCCGGGTTTGCTGGTGATGGATATGGACTCCACCGCCATCCAGATTGAATGTATTGATGAAATTGCCAAACTG…
DA76664	pRD2-hisB		ATGAGTCAGAAGTATCTTTTTATCGATCGCGATGGAACCCTGATTAGCGAACCGCCGAGTGATTTTCAGGTGGACCGTTTTGATAAACTCGCCTTTGAACCGGGCGTGATCCCGGAACTGCTGAAGCTGCAAAAAGCGGGCTACAAGCTGGTGATGATCACTAATCAGGATGGTCTTGGAACACAAAGTTTCCCACAGGCGGATTTCGATGGCCCGCACAACCTGATGATGCAGATCTTCACCTCGCAAGGCGTACAGTTTGATGAAGTGCTGATTTGTCCGCACCTGCCCGCCGATGAGTGCGACTGCCGTAAGCCGAAAGTAAAACTGGTGGAACGTTATCTGGCTGAGCAAGCGATGGATCGCGCTAACAGTTATGTGATTGGCGATCGCGCGACC…

## Sheet: supplementary file 1g
Supplementary Table S7. Oligonucleotides used in this study.
Name	Sequence	Description
Full his operator-lacZ fw	ACTATGCCGATATACTATGCCGATGATTAATTGTCAACATAACATTGCCATAAAATATATAAAAAAG	Full-length his operator (hisL promoter + hisL leader peptide + attenuator region)-lacZ transcriptional fusion
Full his operator-lacZ rev	ACGTTGTAAAACGACGGCCAGTGAATCCGTAATCATGGTCATAAAATTTCCTAATTTTAAACCTGTCTGAACCGTTATC	Full-length his operator (hisL promoter + hisL leader peptide + attenuator region)-lacZ transcriptional fusion
hisL promoter-lacZ rev	ACGTTGTAAAACGACGGCCAGTGAATCCGTAATCATGGTCATAAAATTTCCTAATGTGAATGTTTATTCAACTGATGTC	hisL promoter-lacZ transcriptional fusion
hisL promoter-hisL-lacZ rev	ACGTTGTAAAACGACGGCCAGTGAATCCGTAATCATGGTCATAAAATTTCCTAATCATCGCCTGAAAGACTAGTCAGGAT	hisL promoter + hisL leader peptide-lacZ transcriptional fusion
Full his operator w/o terminator-lacZ rev	ACGTTGTAAAACGACGGCCAGTGAATCCGTAATCATGGTCATAAAATTTCCTAATCCCGGAAGGTGATCTTCCGGGGGCT	hisL promoter + hisL leader peptide + truncated attenuator region (without the terminator stem)-lacZ transcriptional fusion
hisB promoter-lacZ fw	ACTATGCCGATATACTATGCCGATGATTAATTGTCAACATAAGGCGCGCTTTAAAGCCTCCAGTGCGGT	hisB promoter-lacZ transcriptional fusion
hisB promoter-lacZ rev	ACGTTGTAAAACGACGGCCAGTGAATCCGTAATCATGGTCATAAAATTTCCTAATGGTTGTTTATTCTGATCACGTAAGA	hisB promoter-lacZ transcriptional fusion
araBAD promoter-hisL-his attenuator fw	ACTATGCCGATATACTATGCCGATGATTAATTGTCAACATAAAGAGAAGAAACCAATTGTCCATATT	araBAD promoter + his operator-lacZ transcriptional fusion
araBAD promoter-hisL-his attenuator rev megaprimer	CGCGTGTCATAAAAGTCTCTGTGATCCAAAAAAACGGGTATGGAGAAAC	araBAD promoter + his operator-lacZ transcriptional fusion
lac promoter-hisL-his attenuator fw	ATAGGAACTTCAAGATCCCCTTATTAGAAGAACTCGTCAAGAAGGCGATAGAATCACAGAGACTTTTATGACACGCG	lac promoter + his operator lacZ-transcriptional fusion
Hdp1 L7Q fw	AGTAGGTCTTCGCAGTTTTCTCTGTTC	L7Q amino acid substitution in Hdp1
Hdp1 L7Q rev	GAACAGAGAAAACTGCGAAGACCTACT	L7Q amino acid substitution in Hdp1
Hdp1 F8Y fw	AGGTCTTCGCTGTATTCTCTGTTCTTT	F8Y amino acid substitution in Hdp1
Hdp1 F8Y rev	AAAGAACAGAGAATACAGCGAAGACCT	F8Y amino acid substitution in Hdp1
Hdp1 L10Q fw	TCGCTGTTTTCTCAGTTCTTTTCGTGCACCAGTAATCTT	L10Q amino acid substitution in Hdp1
Hdp1 L10Q rev	GCACGAAAAGAACTGAGAAAACAGCGAAGACCTACT	L10Q amino acid substitution in Hdp1
Hdp1 F11Y fw	CTGTTTTCTCTGTACTTTTCGTGCACCAGTAATCTT	F11Y amino acid substitution in Hdp1
Hdp1 F11Y rev	GGTGCACGAAAAGTACAGCGAAGACCT	F11Y amino acid substitution in Hdp1
Hdp1 F12Y fw	TTTTCTCTGTTCTATTCGTGCACCAGTAATCTTGCGCTC	F12Y amino acid substitution in Hdp1
Hdp1 F12Y rev	ACTGGTGCACGAATAGAACAGAGAAAACAGCGAAGACCT	F12Y amino acid substitution in Hdp1
Hdp1 C14S fw	TACTATTCGTCCACCAGTAATCTTTCG	C14S amino acid substitution in Hdp1
Hdp1 C14S rev	ACTGGTGGACGAATAGTACTGAGAATA	C14S amino acid substitution in Hdp1
Hdp1 L18Q fw	TGCACCAGTAATCAAGCGCTCGGCTACTTT	L18Q amino acid substitution in Hdp1
Hdp1 L18Q rev	AAAGTAGCCGAGCGCTTGATTACTGGTGCA	L18Q amino acid substitution in Hdp1
Hdp1 A19S fw	TGCACCAGTAATCTTTCGCTCGGCTACTTT	A19S amino acid substitution in Hdp1
Hdp1 A19S rev	AAAGTAGCCGAGCGAAAGATTACTGGTGCA	A19S amino acid substitution in Hdp1
Hdp1 L20Q fw	ACCAGTAATCTTGCGCAAGGCTACTTTCGCCCC	L20Q amino acid substitution in Hdp1
Hdp1 L20Q rev	GGGGCGAAAGTAGCCTTGCGCAAGATTACTGGT	L20Q amino acid substitution in Hdp1
Hdp1 F23Y fw	GCGCTCGGCTACTATCGCCCCTTCTTG	F23Y amino acid substitution in Hdp1
Hdp1 F23Y rev	CAAGAAGGGGCGATAGTAGCCGAGCGC	F23Y amino acid substitution in Hdp1
Hdp1 F26Y fw	TACTTTCGCCCCTACTTGGTTTATCAT	F26Y amino acid substitution in Hdp1
Hdp1 F26Y rev	ATGATAAACCAAGTAGGGGCGAAAGTA	F26Y amino acid substitution in Hdp1
Hdp1 L27Q fw	TACTTTCGCCCCTTCCAGGTTTATCATTGGGTGGGTCACAGGTGT	L27Q amino acid substitution in Hdp1
Hdp1 L27Q rev	ACCCACCCAATGATAAACCTGGAAGGGGCGAAAGTAGCTGAGCGC	L27Q amino acid substitution in Hdp1
Hdp1 V28N fw	TACTTTCGCCCCTTCTTGAATTATCATTGGGTGGGTCAC	V28N amino acid substitution in Hdp1
Hdp1 V28N rev	GTGACCCACCCAATGATAATTCAAGAAGGGGCGAAAGTA	V28N amino acid substitution in Hdp1
Hdp1 V32N fw	TACTTGGTTTATCATTGGAATGGTCACAGGTGTAAGTGTGAGGGT	V32N amino acid substitution in Hdp1
Hdp1 V32N rev	CTTACACCTGTGACCATTCCAATGATAAACCAAGTAGGGGCGATA	V32N amino acid substitution in Hdp1
Hdp1 C36S, C38S fw	GGTCACAGGTCTAAGTCTGAGGGTACCGAGCGTCGGC	C36S, C38S amino acid substitutions in Hdp1
Hdp1 C36S, C38S rev	GGTACCCTCAGACTTAGACCTGTGACCATTCCAATG	C36S, C38S amino acid substitution in Hdp1
Hdp1 I41T fw	AAGTGTGAGGGTACCGAGCGTCGGGTG	I41T amino acid substitution in Hdp1
Hdp1 I41T rev	CACCCGACGCTCGGTACCCTCACACTT	I41T amino acid substitution in Hdp1
Hdp1 V45Q fw	ATCGAGCGTCGGCAGACTAGGTGGTGG	V45Q amino acid substitution in Hdp1
Hdp1 V45Q rev	CCACCACCTAGTCTGCCGACGCTCGAT	V45Q amino acid substitution in Hdp1
Hdp1 W49Stop fw	CGGGTGACTAGGTGATGGTAGCTGCAG	W49 to Stop codon in Hdp1
Hdp1 W49Stop rev	CTGCAGCTACCATCACCTAGTCACCCG	W49 to Stop codon in Hdp1
pRD2 insert random mutagenesis fw	GCGGCCGCTTCTAGAGAAAGAGGA	Random mutagenesis of Hdp1 and Hdp2
pRD2 insert random mutagenesis rev	TAATCTAACTAACTAACCCTTAGT	Random mutagenesis of Hdp1 and Hdp2
rrnB P1 promoter-lacZ fw	ACTATGCCGATATACTATGCCGATGATTAATTGTCAACATAACAGAAAATTATTTTAAATTTCCTCTT	rrnB P1 promoter-lacZ transcriptional fusion (reporter for stringent response)
rrnB P1 promoter-lacZ rev	ACGTTGTAAAACGACGGCCAGTGAATCCGTAATCATGGTCATAAAATTTTTTTCCAAATGTGTTTGCCGTTGTTCCGTGTCAGT	rrnB P1 promoter-lacZ transcriptional fusion (reporter for stringent response)
thr operator-lacZ fw	ACTATGCCGATATACTATGCCGATGATTAATTGTCAACATAAGCCGTGAGTAAATTAAAATTTTATT	Full-length thr operator (thrL promoter + thrL leader peptide + attenuator region)-lacZ transcriptional fusion), reporter for specificity and stringent response
thr operator-lacZ rev	ACGTTGTAAAACGACGGCCAGTGAATCCGTAATCATGGTCATTTTTTTTCCTAAATGTTACCTTTGGTCGAAAAAAAAAGCCCGCACTG	Full-length thr operator (thrL promoter + thrL leader peptide + attenuator region)-lacZ transcriptional fusion), reporter for specificity and stringent response
T7-his operator fw	CCAAGTAATACGACTCACTATAGGATCAGTTGAATAAACATTCACAGAG	T7 in vitro transcription primer for generating full-length his operator RNA; T7 RNAP promoter is bold
T7-his operator rev	TTTAAACCTGTCTGAACCG	T7 in vitro transcription primer for generating full-length his operator RNA
T7-thr operator fw	CCAAGTAATACGACTCACTATAGGATAGCGCACAGACAGATAAAAATTACAGAG	T7 in vitro transcription primer for generating full-length thr operator RNA; T7 RNAP promoter is bold
T7-thr operator rev	CGTTACCTTTGGTCGAAAAAAAAAGCCC	T7 in vitro transcription primer for generating full-length thr operator RNA
Hdp1opt(+cys) L27Q QC fw	GCTACTATCGCCCCTACCAGGTTTATCATTGGGTG	QuickChange mutagenesis primer for generating Hdp1opt(+cys) L27Q-HA tag
Hdp1opt(+cys) L27Q QC rev	CACCCAATGATAAACCTGGTAGGGGCGATAGTAGC	QuickChange mutagenesis primer for generating Hdp1opt(+cys) L27Q-HA tag
hisB-qPCR-fw	GTGTGGCTGGATCGTGAAG	qPCR primer for detecting hisB RNA in co-IP/pull-down experiments
hisB-qPCR-rev	GTCGCCTTTGACGTTGATTT	qPCR primer for detecting hisB RNA in co-IP/pull-down experiments
hisL-qPCR-fw	AAACACCACCATCATCACCA	qPCR primer for detecting hisL RNA in co-IP/pull-down experiments
hisL-qPCR-rev	GCACCACTGGAAGATCTGAA	qPCR primer for detecting hisL RNA in co-IP/pull-down experiments
hisG-qPCR-fw	ATTTGCGATCTGGTTTCCAC	qPCR primer for detecting hisG RNA in co-IP/pull-down experiments
hisG-qPCR-rev	GATTCTTCCATTTCGCCATC	qPCR primer for detecting hisG RNA in co-IP/pull-down experiments
thrL-qPCR-fw	ATAGCGCACAGACAGATAAA	qPCR primer for detecting thrL RNA in co-IP/pull-down experiments
thrL-qPCR-rev	TGGTGATGGTGGTGGTAATG	qPCR primer for detecting thrL RNA in co-IP/pull-down experiments
thrA-qPCR-fw	AAGGCTCTGCTCACCAATGT	qPCR primer for detecting thrA RNA in co-IP/pull-down experiments
thrA-qPCR-rev	TTAAACGGCTCTTTGGCTTG	qPCR primer for detecting thrA RNA in co-IP/pull-down experiments
