# Supplementary figures and images for: Rescue of Escherichia coli auxotrophy by de novo small proteins
Source: eLife journal article supplement (doi:10.7554/elife.78299), 2023-03-15

*thr* RNA + Hdp1<sub>opt</sub>

unbound *thr* RNA

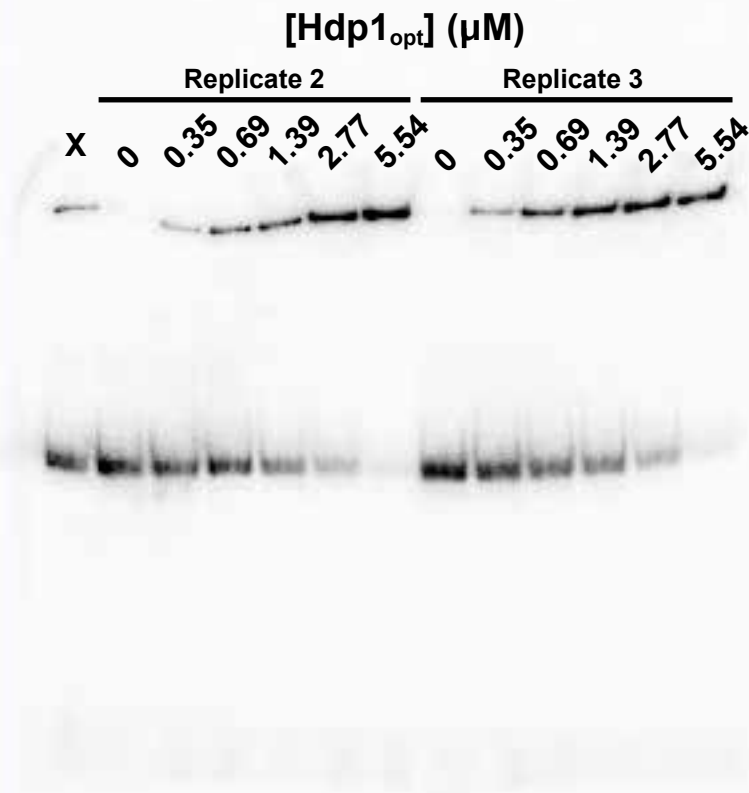

Supplement: fig3-data1 [file elife-78299-fig3-data1-v2.zip]

*his* RNA + Hdp1<sub>opt</sub>

unbound *his* RNA

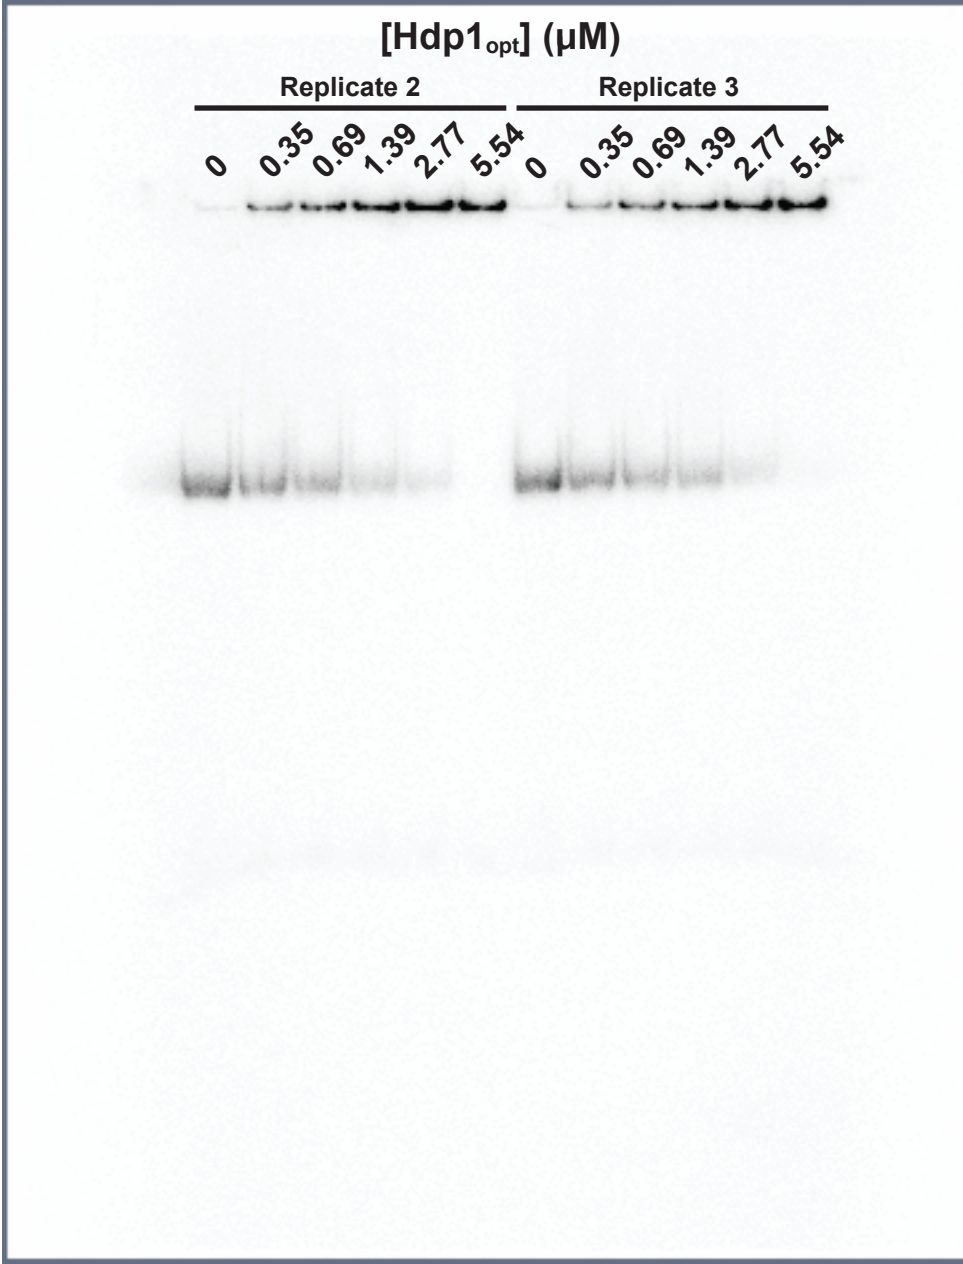

Supplement: fig3-data1 [file elife-78299-fig3-data1-v2.zip]

(i)

[Hdp1<sub>opt</sub>] (μM)  
NR OH T1 0 0.69 5.54

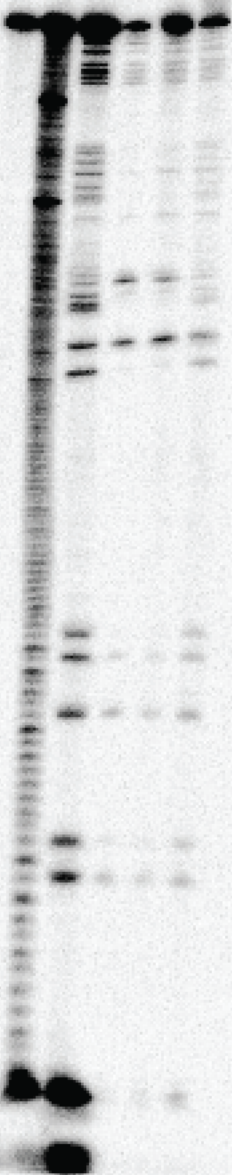

(ii)

[Hdp1<sub>opt</sub>] (μM)  
NR OH T1 0 0.69 5.54

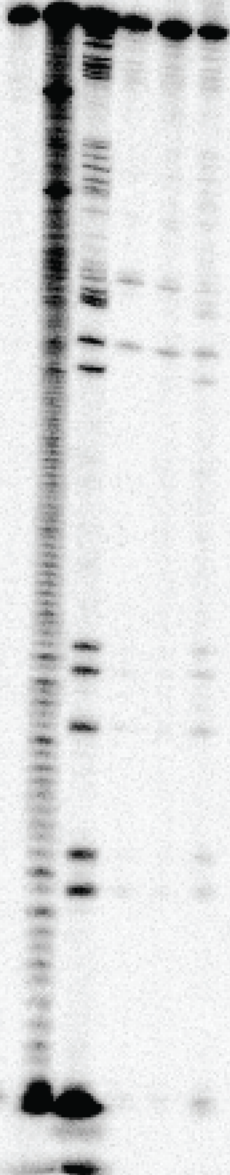

(iii)

[Hdp1<sub>opt</sub>] (μM)  
NR OH T1 0 5.54

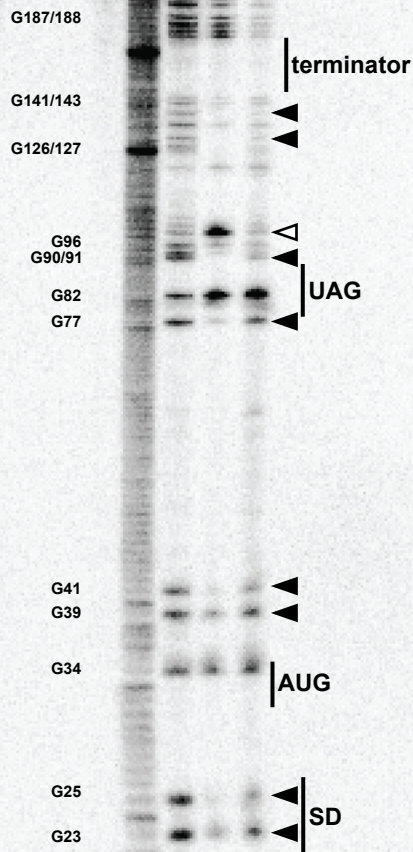

Supplement: fig3-data1 [file elife-78299-fig3-data1-v2.zip]

*his* RNA + Hdp1<sub>opt</sub>

unbound *his* RNA

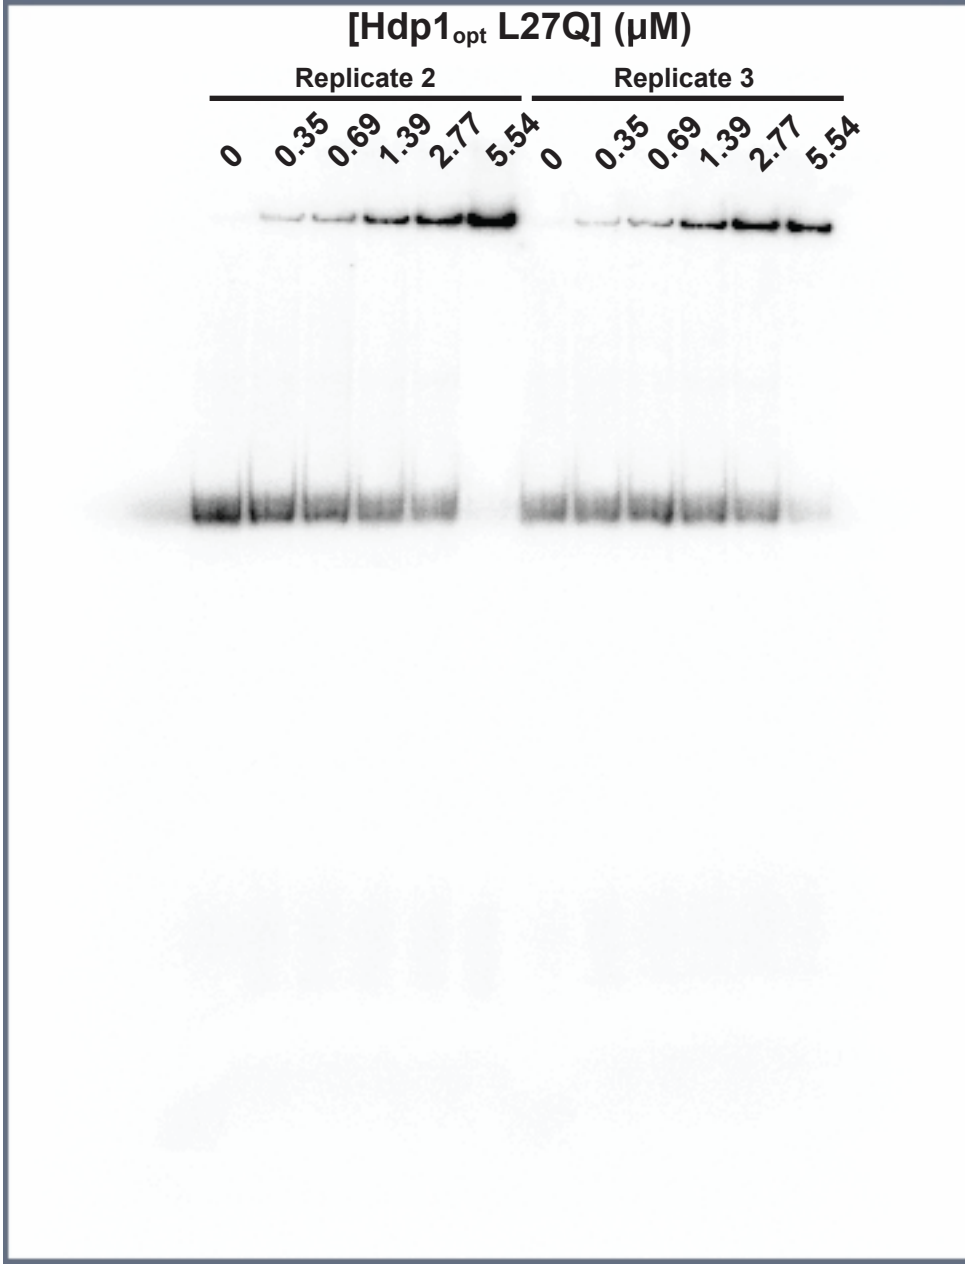

Supplement: fig3-data1 [file elife-78299-fig3-data1-v2.zip]

*his* RNA + Hdp1<sub>opt</sub>

unbound *his* RNA

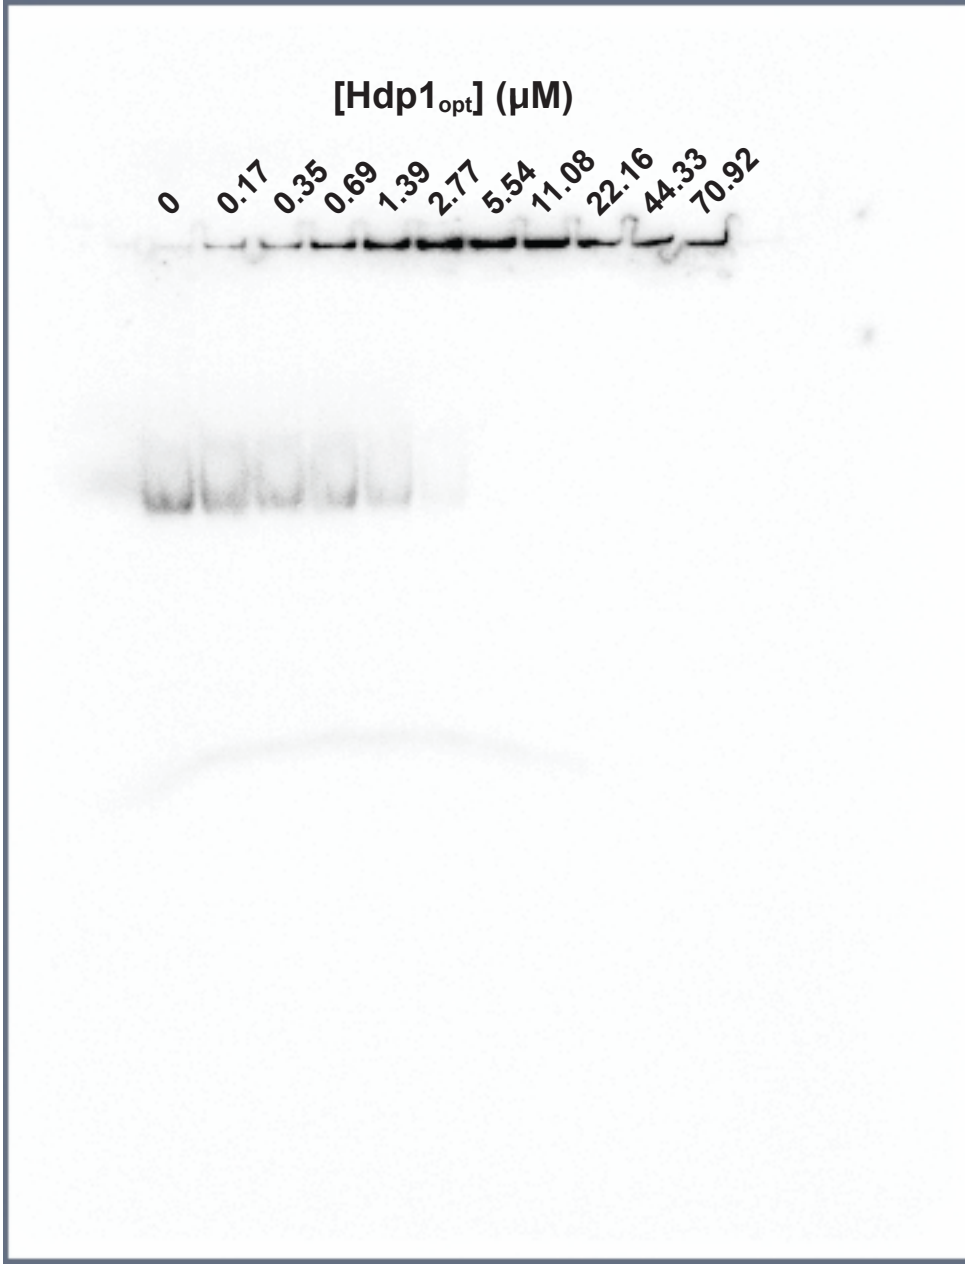

Supplement: fig3-data1 [file elife-78299-fig3-data1-v2.zip]

*thr* RNA + Hdp1<sub>opt</sub>

unbound *thr* RNA

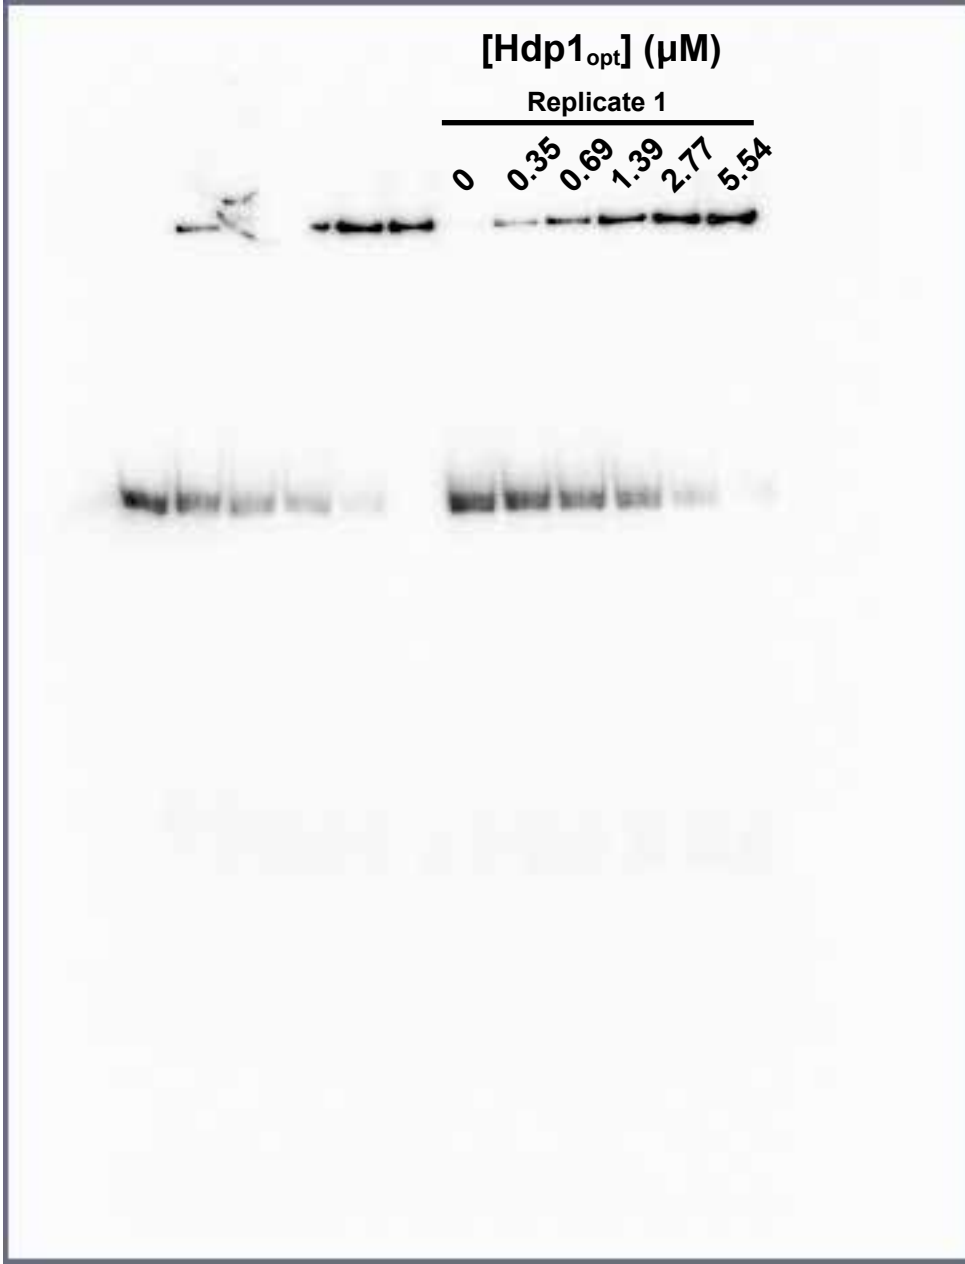

Supplement: fig3-data1 [file elife-78299-fig3-data1-v2.zip]

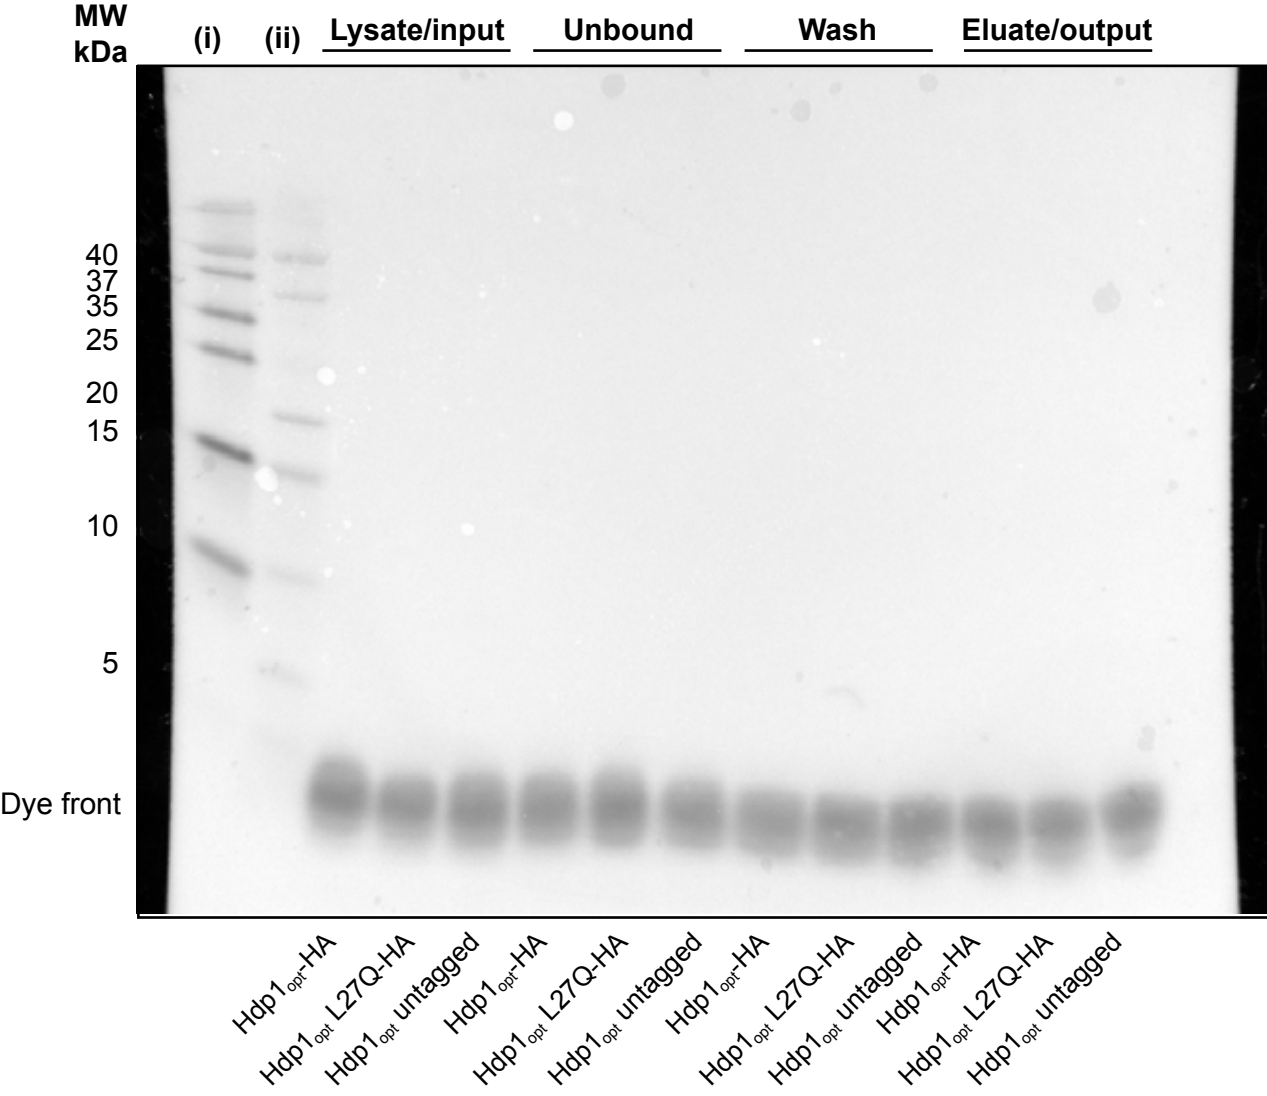

Supplement: fig3-figsupp2-data2 [file elife-78299-fig3-figsupp2-data2-v2.zip]

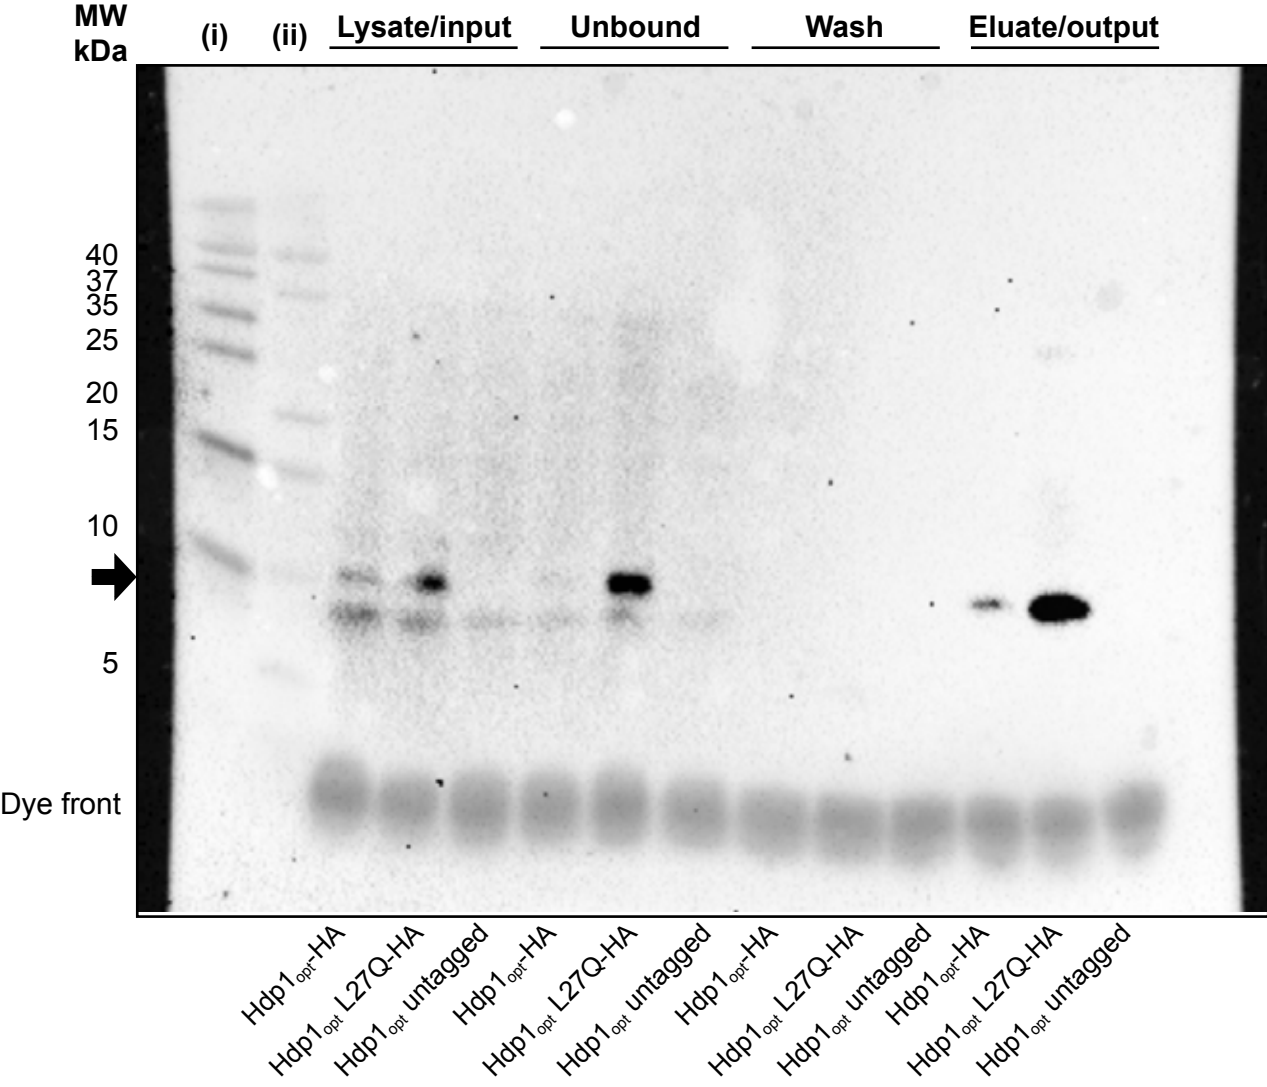

Supplement: fig3-figsupp2-data3 [file Figure 3-figure supplement 2 - labeled source data 3.pdf › Figure 3-figure supplement 2 - labeled source data 3.pdf]

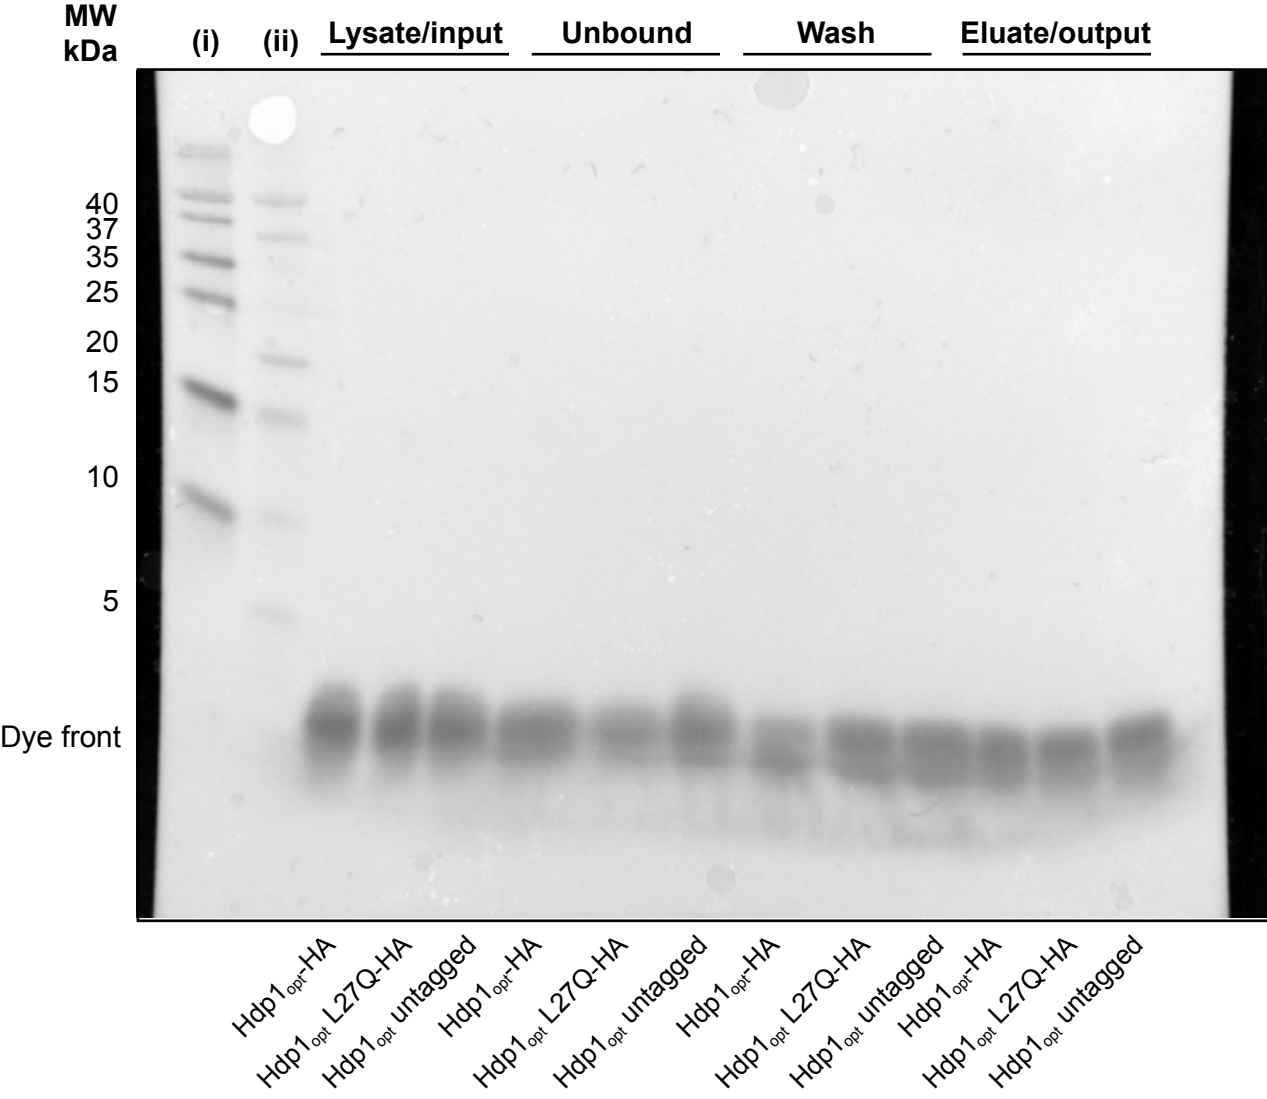

Supplement: fig3-figsupp2-data5 [file Figure 3-figure supplement 2 - labeled source data 5.pdf › Figure 3-figure supplement 2 - labeled source data 5.pdf]

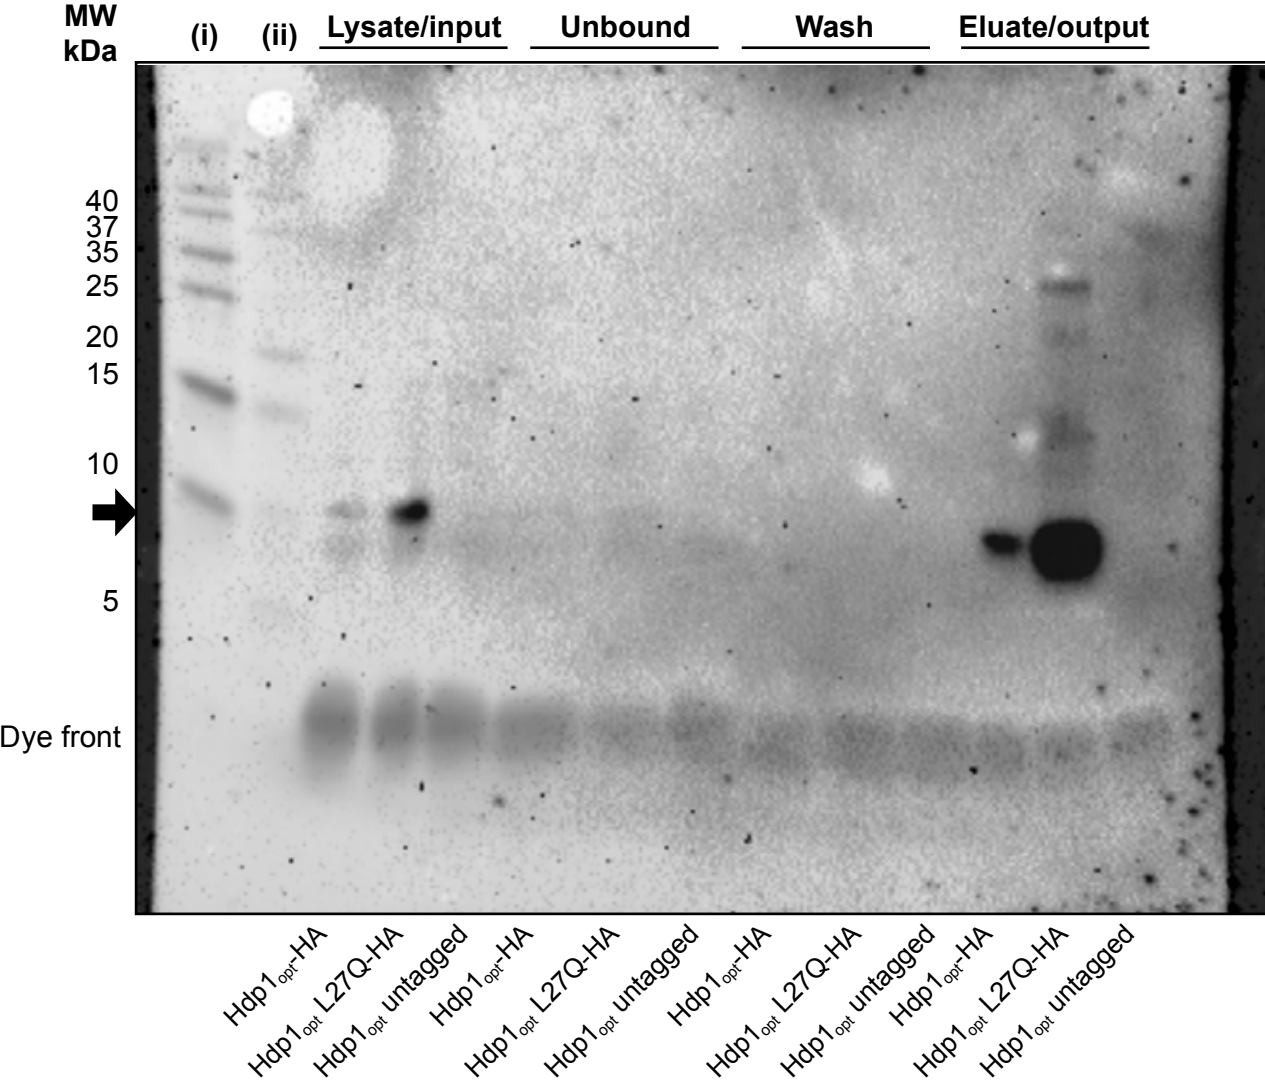

Supplement: fig3-figsupp2-data6 [file elife-78299-fig3-figsupp2-data6-v2.zip]

*his* RNA + Hdp1<sub>opt</sub>

unbound *his* RNA

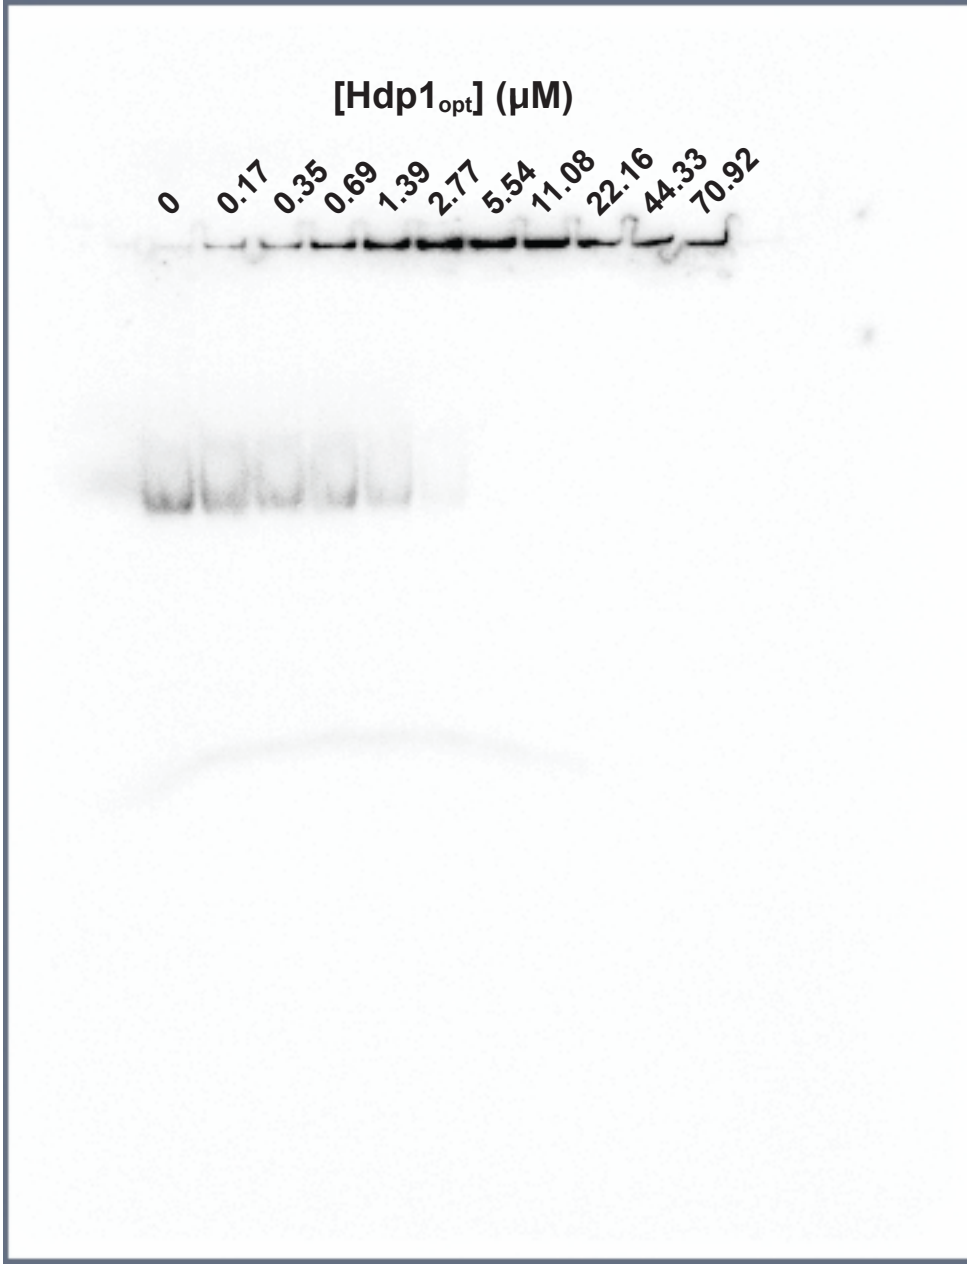

Supplement: fig3-figsupp3-data1 [file Figure 3-figure supplement 3 - labeled source data 1.pdf › Figure 3-figure supplement 3 - labeled source data 1.pdf]

*his* RNA + Hdp1<sub>opt</sub>

unbound *his* RNA



Supplement: fig3-figsupp3-data2 [file elife-78299-fig3-figsupp3-data2-v2.zip]

*his* RNA + Hdp1<sub>opt</sub>

unbound *his* RNA



Supplement: fig3-figsupp3-data4 [file elife-78299-fig3-figsupp3-data4-v2.zip]

*thr* RNA + Hdp1<sub>opt</sub>

unbound *thr* RNA



Supplement: fig3-figsupp3-data5 [file Figure 3-figure supplement 3 - labeled source data 5.pdf › Figure 3-figure supplement 3 - labeled source data 5.pdf]

*thr* RNA + Hdp1<sub>opt</sub>

unbound *thr* RNA

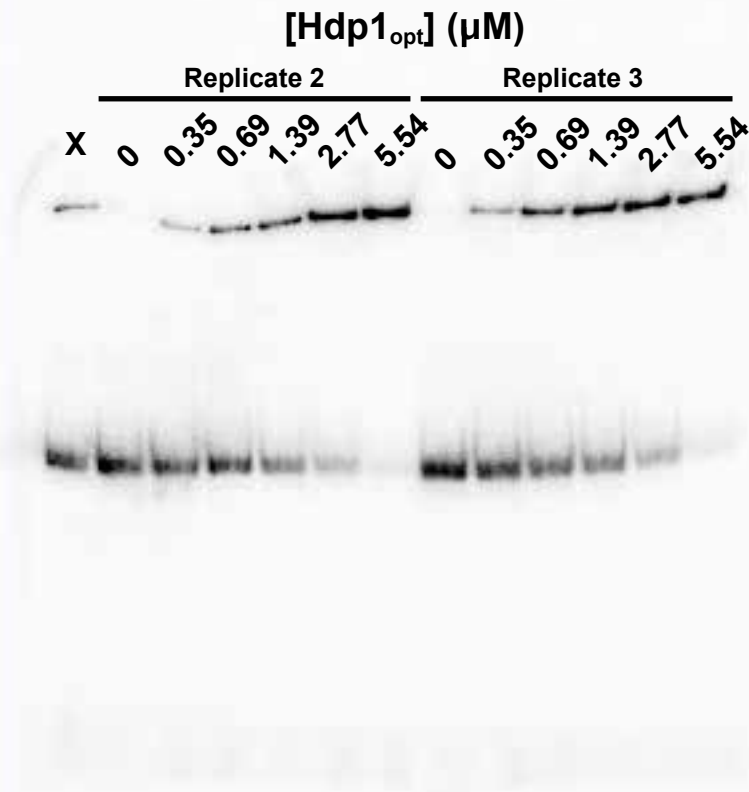

Supplement: fig3-figsupp3-data6 [file elife-78299-fig3-figsupp3-data6-v2.zip]

(i)

[Hdp1<sub>opt</sub>] (μM)  
NR OH T1 0 0.69 5.54



(ii)

[Hdp1<sub>opt</sub>] (μM)

NR OH T1 0 0.69 5.54



(iii)

[Hdp1<sub>opt</sub>] (μM)

NR OH T1 0 5.54



Supplement: fig3-figsupp4-data1 [file Figure 3-figure supplement 4 - labeled source data 1.pdf › Figure 3-figure supplement 4 - labeled source data 1.pdf]
